# Supplementary material for: Use of the Naturally Occurring Bacteriophage Grouping Model for the Design of Potent Therapeutic Cocktails
Source: MDPI journal article supplement (doi:10.3390/antibiotics13050385), 2024-04-24

Table S1. *P. aeruginosa* strains list.

| Original Name          | Location   | Country  | Year (2) | Source          | fAFLP | Serotype | <i>oprD</i>  | <i>oprL</i> | <i>oprI</i> | <i>exoS/U</i> | <i>TfpO</i>             | <i>fpvA</i> | <i>fpvB</i> | Genes mediating ABR           | ABR group |
|------------------------|------------|----------|----------|-----------------|-------|----------|--------------|-------------|-------------|---------------|-------------------------|-------------|-------------|-------------------------------|-----------|
| PER08                  | Ghent      | Belgium  | 1992     | Wound           | 32    | 11       | C202         | B12         | B1          | <i>exoS</i>   | NA                      | I           | POS         | PER-1/2, ANT(2")              | 3         |
| Bu002                  | Budapest   | Hungary  | 1997     | Wound           | 24    | 11       | B107         | B12         | B1          | <i>exoS</i>   | <i>TfpO<sub>b</sub></i> | II b        | POS         | ANT(3")-Ia                    | 4         |
| 9AR3                   | De Haan    | Belgium  | 1993     | CF-patient      |       | NT       | B110         | B07         | B1          | <i>exoS</i>   | <i>TfpO<sub>b</sub></i> | III         | POS         | NA                            | 2         |
| PHLS08959 (Liverpool)  | Liverpool  | UK       | 2003     | CF-patient      | 20    | NT       | B108         | B02         | B1          | <i>exoS</i>   | <i>TfpO<sub>b</sub></i> | III         | POS         | NA                            | 3         |
| MC161                  | Leuven     | Belgium  | 2003     | CF-patient      | 20    | NT       | B101         | B12         | B1          | <i>exoS</i>   | <i>TfpO<sub>b</sub></i> | III         | POS         | NA                            | TRM       |
| PHLS08916 (Midlands I) | Birmingham | UK       | 2003     | CF-patient      | 20    | NT       | B107         | B12         | B1          | <i>exoS</i>   | <i>TfpO<sub>b</sub></i> | III         | POS         | NA                            | 4         |
| 13BR3                  | De Haan    | Belgium  | 1993     | CF-patient      |       | NT       | B115         | B02         | A1          | <i>exoS</i>   | NA                      | III         | POS         | NA                            | 2         |
| Li010                  | Lisbon     | Portugal | 1997     | CF-patient      |       | NT       | B104 (DOM6)  | A07         | B1          | <i>exoS</i>   | <i>TfpO<sub>b</sub></i> | III         | POS         | NA                            | 5         |
| So095                  | Sofia      | Bulgaria | 1997     | Burn            |       | NT       | C106         | B12         | B1          | <i>exoS</i>   | NA                      | III         | POS         | NA                            | 0         |
| Bo546                  | Boston     | USA      | 1992     | Burn            |       | 12       | B114         | B15         | E1          | <i>exoS</i>   | NA                      | I           | POS         | GES-1/2, TEM-like, AAC(3)-IIa | 3         |
| O12-20                 | Roehampton | UK       | 1987     | Clinical non CF |       | 12       | C103         | B11         | A1          | <i>exoS</i>   | <i>TfpO<sub>b</sub></i> | I           | POS         | ANT(3")-Ia                    | 1         |
| So098                  | Sofia      | Bulgaria | 1997     | Wound           | 37    | 12       | A111         | B08         | B1          | <i>exoS</i>   | <i>TfpO<sub>b</sub></i> | III         | POS         | PSE, AAC(6')-Ib               |           |
| O12-17                 | Pordenone  | Italy    | 1988     | Clinical non CF | 37    | 12       | A111         | B08         | B1          | <i>exoS</i>   | <i>TfpO<sub>b</sub></i> | III         | POS         | PSE, AAC(6')-Ib               |           |
| Co7388                 | Cali       | Colombia | 1999     | Urine           | 37    | 12       | A111         | B08         | B1          | <i>exoS</i>   | <i>TfpO<sub>b</sub></i> | III         | POS         | VIM-2-like                    |           |
| Co380791               | Cali       | Colombia | 2003     | Blood           | 37    | 12       | A111         | B08         | B1          | <i>exoS</i>   | <i>TfpO<sub>b</sub></i> | III         | POS         | VIM-2-like, AAC(6')-Ib        |           |
| 1709-12                | Leuven     | Belgium  | 2004     | Clinical non CF | 37    | 12       | A111 (DOM20) | B08         | B1          | <i>exoS</i>   | <i>TfpO<sub>b</sub></i> | III         | POS         | PSE, AAC(6')-Ib               | 5         |
| 1709-20                | Leuven     | Belgium  | 2004     | Clinical non CF | 37    | 12       | A111 (DOM20) | B08         | B1          | <i>exoS</i>   | <i>TfpO<sub>b</sub></i> | III         | POS         | PSE, AAC(6')-Ib               | 5         |
| MC110                  | Brussels   | Belgium  | 2003     | CF-patient      | 20    | NT       | B101         | B02         | A1          | <i>exoS</i>   | <i>TfpO<sub>b</sub></i> | I           | POS         | NA                            | 2         |
| CPHL 10701             | Surrey     | UK       | 1967     | Sputum          | 20    | NT       | B107         | B07         | A1          | <i>exoS</i>   | <i>TfpO<sub>b</sub></i> | I           | POS         | NA                            | 1         |
| MC361 (blue)           | Brussels   | Belgium  | 2003     | CF-patient      | 20    | NT       | B112         | B05         | B1          | <i>exoS</i>   | <i>TfpO<sub>b</sub></i> | I           | POS         | NA                            | 2         |
| MC116                  | Brussels   | Belgium  | 2003     | CF-patient      | 31    | NT       | B107 (DOM17) | B12         | B1          | <i>exoS</i>   | <i>TfpO<sub>b</sub></i> | I           | POS         | NA                            | 2         |
| MC305                  | Ghent      | Belgium  | 2003     | CF-patient      | 31    | NT       | B101         | B02         | A1          | <i>exoS</i>   | <i>TfpO<sub>b</sub></i> | I           | POS         | NA                            | 1         |

|                 |              |           |           |                |    |      |              |     |    |             |                         |      |     |                 |     |
|-----------------|--------------|-----------|-----------|----------------|----|------|--------------|-----|----|-------------|-------------------------|------|-----|-----------------|-----|
| Clone M         | Hanover      | Germany   | 1994      | CF-patient     | 20 | NT   | B106 (DOM15) | B12 | B1 | <i>exoS</i> | <i>TfpO<sub>b</sub></i> | I    | POS | NA              | 1   |
| LiA11/2004      | Almada       | Portugal  | 2004      | Cat nose       | 36 | 9    | B101         | B02 | A1 | <i>exoS</i> | <i>TfpO<sub>b</sub></i> | I    | POS | NA              | 2   |
| CPHL 2000       | London       | UK        | 1923      | Wound          | 30 | 9    | B113         | B05 | A1 | <i>exoS</i> | <i>TfpO<sub>b</sub></i> | I    | POS | NA              | 0   |
| CPHL 1999       | London       | UK        | 1924      | Ear            | 30 | NT   | C103         | B11 | A1 | <i>exoS</i> | NA                      | I    | POS | NA              | 0   |
| TA21            | Hobart       | Australia | 2004      | Sputum         | 20 | NT   | C108         | B02 | A1 | <i>exoS</i> | NA                      | I    | POS | NA              | 2   |
| PN1352(65)w     | Panama City  | Panama    | 2006      | Nose           | 20 | NT   | C103         | B11 | A1 | <i>exoS</i> | NA                      | I    | POS | NA              | 1   |
| NCF013          | Hobart       | Australia | 2003      | Lung carcinoma | 20 | NT   | C103         | B11 | A1 | <i>exoS</i> | NA                      | I    | POS | NA              | 1   |
| NCF015          | Hobart       | Australia | 2003      | COPD           | 20 | NT   | C106         | B12 | A1 | <i>exoS</i> | NA                      | I    | POS | NA              | 1   |
| TA28            | Hobart       | Australia | 2004      | Wound          | 20 | NT   | C109         | B12 | B1 | <i>exoS</i> | NA                      | I    | POS | NA              | 2   |
| MC178 (LCV)     | Brussels     | Belgium   | 2003      | CF-patient     | 34 | NT   | B107         | B11 | A1 | <i>exoS</i> | NA                      | I    | POS | NA              | 1   |
| MC178 (SCV)     | Brussels     | Belgium   | 2003      | CF-patient     | 34 | NT   | B107         | B11 | A1 | <i>exoS</i> | NA                      | I    | POS | NA              | TRM |
| C2 (clone C)    | Hannover     | Germany   | 1988      | CF-patient     | 28 | 1/13 | B106         | B02 | B1 | <i>exoS</i> | NA                      | II b | POS | NA              | 2   |
| PA7             | Buenos Aires | Argentina | pre 1984  | Wound          |    | 12   | A204         | E03 | F1 | NA          | NA                      | II b | NA  | NA              | 4   |
| SIS3740 (O12)   | Athens       | Greece    | 1994      | Sputum         | 38 | 12   | A111         | B08 | B1 | <i>exoS</i> | <i>TfpO<sub>b</sub></i> | III  | POS | PSE, AAC(6')-Ib | 4   |
| PER05           | Ghent        | Belgium   | 1999      | Sputum         | 38 | 12   | A111         | B08 | B1 | <i>exoS</i> | <i>TfpO<sub>b</sub></i> | III  | POS | PER-1/2         | 2   |
| Br667 (AFLP 35) | Brussels     | Belgium   | 1998      | Burn           | 33 | 12   | A111         | B08 | B1 | <i>exoS</i> | <i>TfpO<sub>b</sub></i> | III  | POS | PSE, AAC(6')-Ib | 4   |
| Br993           | Brussels     | Belgium   | 1999      | Sputum         | 33 | 12   | A111 (DOM13) | B08 | B1 | <i>exoS</i> | <i>TfpO<sub>b</sub></i> | III  | POS | PSE, AAC(6')-Ib | 5   |
| Lo049           | London       | UK        | 1996      | Burn           | 33 | 12   | A111         | B08 | B1 | <i>exoS</i> | <i>TfpO<sub>b</sub></i> | III  | POS | PSE, AAC(6')-Ib | 4   |
| KAT3529 (O12)   | Athens       | Greece    | 1994      | Wound          | 39 | 12   | A111 (DOM16) | B08 | B1 | <i>exoS</i> | <i>TfpO<sub>b</sub></i> | III  | POS | AAC(6')-Ib      | 4   |
| Is586(13T)      | Istanbul     | Turkey    | 1997      | Burn           | 39 | 12   | A111         | B08 | B1 | <i>exoS</i> | <i>TfpO<sub>b</sub></i> | III  | POS | PSE, AAC(6')-Ib | 4   |
| A10             | Paris        | France    | 1882-1918 | Wound          | 28 | 1    | B103         | B12 | B1 | <i>exoS</i> | <i>TfpO<sub>b</sub></i> | I    | POS | NA              | 0   |
| 10BR1           | De Haan      | Belgium   | 1993      | CF-patient     | 14 | 1    | B107         | B12 | B1 | <i>exoS</i> | NA                      | I    | POS | NA              | 2   |
| Aa249           | Aachen       | Germany   | 1997      | Burn           | 30 | NT   | B107 (DOM7)  | B12 | B1 | <i>exoS</i> | <i>TfpO<sub>b</sub></i> | I    | POS | AAC(6')-Ib      | 5   |
| Bu004           | Budapest     | Hungary   | 1997      | Throat         | 32 | NT   | C106         | B12 | A1 | <i>exoS</i> | NA                      | I    | POS | NA              | 1   |
| Bo548           | Boston       | USA       | 1992      | Burn           |    | NT   | C107 (DOM12) | B12 | A1 | <i>exoS</i> | NA                      | I    | POS | NA              | 2   |
| So099           | Sofia        | Bulgaria  | 1997      | Burn           |    | NT   | C104         | B01 | A1 | <i>exoS</i> | NA                      | I    | POS | AAC(6')-Ib      | 4   |

|                           |                  |                    |               |            |    |      |                 |     |    |             |                         |       |     |                                       |   |
|---------------------------|------------------|--------------------|---------------|------------|----|------|-----------------|-----|----|-------------|-------------------------|-------|-----|---------------------------------------|---|
| NCF017                    | Hobart           | Australia          | 2003          | Sputum     | 43 | NT   | C103            | B12 | B1 | <i>exoS</i> | <i>TfpO<sub>b</sub></i> | I     | POS | NA                                    | 1 |
| Is579                     | Istanbul         | Turkey             | 1997          | Burn       | 30 | 8    | B112            | B02 | B1 | <i>exoS</i> | NA                      | IIa** | POS | NA                                    | 3 |
| PHLS08960<br>(Manchester) | Manchester       | UK                 | 2003          | CF-patient | 7  | NT   | B107<br>(DOM14) | B02 | A1 | <i>exoS</i> | <i>TfpO<sub>b</sub></i> | II b  | POS | NA                                    | 4 |
| TA03                      | Hobart           | Australia          | 2004          | Wound      | 20 | NT   | A113            | B02 | B1 | <i>exoS</i> | NA                      | II b  | POS | NA                                    | 1 |
| A20                       | Paris            | France             | 1882-<br>1918 | Wound      | 28 | NT   | B101            | B12 | B1 | <i>exoS</i> | <i>TfpO<sub>b</sub></i> | II b  | POS | NA                                    | 0 |
| Lw1047                    | Lwiro            | Congo              | 2001          | Blood      | 30 | NT   | B107            | B02 | A1 | <i>exoS</i> | <i>TfpO<sub>b</sub></i> | II b  | POS | ANT(3")-Ia                            | 4 |
| MC084                     | Antwerp          | Belgium            | 2003          | CF-patient | 20 | NT   | B106            | B02 | B1 | <i>exoS</i> | NA                      | II b  | POS | NA                                    | 1 |
| MC039                     | Ghent            | Belgium            | 2003          | CF-patient | 20 | NT   | B107<br>(DOM18) | B12 | B1 | <i>exoS</i> | NA                      | II b  | POS | NA                                    | 5 |
| MC093                     | Leuven           | Belgium            | 2003          | CF-patient | 21 | NT   | B106            | B02 | B1 | <i>exoS</i> | NA                      | II b  | POS | NA                                    | 2 |
| MC325                     | Ghent            | Belgium            | 2003          | CF-patient | 21 | NT   | B106<br>(DOM19) | B02 | B1 | <i>exoS</i> | NA                      | II b  | POS | NA                                    | 4 |
| MC075                     | Antwerp          | Belgium            | 2003          | CF-patient | 21 | NT   | B106            | B02 | B1 | <i>exoS</i> | <i>TfpO<sub>b</sub></i> | II b  | POS | NA                                    | 1 |
| MC142                     | Brussels         | Belgium            | 2003          | CF-patient | 20 | NT   | B110            | B01 | B1 | <i>exoS</i> | <i>TfpO<sub>b</sub></i> | II b  | POS | NA                                    | 3 |
| MC099                     | Ghent            | Belgium            | 2003          | CF-patient | 20 | NT   | B101            | B02 | B1 | <i>exoS</i> | <i>TfpO<sub>b</sub></i> | II b  | POS | NA                                    | 3 |
| MC299                     | Brussels         | Belgium            | 2003          | CF-patient | 21 | 1    | B106            | B02 | B1 | <i>exoS</i> | NA                      | II b  | POS | NA                                    | 1 |
| C13 (clone C)             | Hannover         | Germany            | 1985          | CF-patient | 28 | 1    | B106            | B02 | B1 | <i>exoS</i> | NA                      | II b  | POS | NA                                    | 0 |
| U018A (CF<br>type 4)      | Hobart           | Australia          | 2003          | CF-patient | 20 | 1    | B110            | B12 | B1 | <i>exoS</i> | <i>TfpO<sub>b</sub></i> | II b  | POS | NA                                    | 1 |
| C1 (clone C)              | Hannover         | Germany            | 1987          | CF-patient | 28 | 1/13 | B106            | B02 | B1 | <i>exoS</i> | NA                      | II b  | POS | NA                                    | 2 |
| U003A (CF<br>type 4)      | Hobart           | Australia          | 2003          | CF-patient | 43 | 1    | B110            | B12 | B1 | <i>exoS</i> | <i>TfpO<sub>b</sub></i> | II b  | POS | NA                                    | 4 |
| TA08                      | Hobart           | Australia          | 2003          | Sputum     | 20 | 3    | B107            | B12 | B1 | <i>exoS</i> | NA                      | II b  | POS | NA                                    | 1 |
| So103                     | Sofia            | Bulgaria           | 1997          | Wound      | 9  | 11   | C202            | B02 | B1 | <i>exoU</i> | NA                      | II b  | POS | OXA-group I,<br>AAC(6')-Ib            | 3 |
| Aa245                     | Aachen           | Germany            | 1997          | Burn       | 11 | 11   | C202<br>(DOM3)  | B02 | B1 | <i>exoU</i> | NA                      | II b  | POS | GES-1/2, TEM-<br>like, AAC(6')-<br>Ib | 5 |
| TA34                      | Hobart           | Australia          | 2004          | Urine      | 22 | NT   | B107            | B07 | A1 | <i>exoS</i> | NA                      | II b  | POS | NA                                    | 2 |
| A11                       | Paris            | France             | 1882-<br>1918 | Wound      | 28 | NT   | B101            | B12 | B1 | <i>exoS</i> | <i>TfpO<sub>b</sub></i> | II b  | POS | NA                                    | 0 |
| A16                       | Paris            | France             | 1882-<br>1918 | Wound      | 28 | NT   | B101            | B12 | B1 | <i>exoS</i> | <i>TfpO<sub>b</sub></i> | II b  | POS | NA                                    | 0 |
| A13                       | Paris            | France             | 1882-<br>1918 | Wound      | 28 | NT   | B101            | B12 | B1 | <i>exoS</i> | <i>TfpO<sub>b</sub></i> | II b  | POS | NA                                    | 0 |
| PhDW6                     | Tacloban<br>City | The<br>Philippines | 1993          | Wound      |    | NT   | B101            | B13 | A1 | <i>exoS</i> | <i>TfpO<sub>b</sub></i> | II b  | POS | NA                                    | 2 |

|                   |             |                |           |            |    |           |              |     |    |               |                         |        |     |                              |   |
|-------------------|-------------|----------------|-----------|------------|----|-----------|--------------|-----|----|---------------|-------------------------|--------|-----|------------------------------|---|
| A22               | Paris       | France         | 1882-1918 | Wound      | 20 | 6         | B107         | B12 | B1 | <i>exoS</i>   | <i>TfpO<sub>b</sub></i> | II b   | POS | NA                           | 1 |
| Br670             | Brussels    | Belgium        | 1998      | Sputum     | 30 | 6         | B107 (DOM8)  | B07 | B1 | <i>exoS</i>   | <i>TfpO<sub>b</sub></i> | II b   | POS | SHV                          | 3 |
| Br776             | Brussels    | Belgium        | 1998      | Throat     |    | 6         | B110         | B12 | B1 | <i>exoS</i>   | <i>TfpO<sub>b</sub></i> | II b   | POS | NA                           | 4 |
| CPHL 6749         | Elstree     | UK             | 1944      | Urine      | 20 | 6         | C103         | B12 | B1 | <i>exoS</i>   | <i>TfpO<sub>b</sub></i> | I      | POS | NA                           | 1 |
| AES1              | Australia   | Australia      | 1999      | CF-patient |    | 6         | B119         | B02 | A1 | <i>exoS</i>   | <i>TfpO<sub>b</sub></i> | III    | POS | NA                           | 1 |
| M-184             | Bucarest    | Romania        | 1965-1978 | Faeces     | 7  | 1/3/10/13 | B107         | B02 | A1 | <i>exoS</i>   | NA                      | II a   | POS | NA                           | 1 |
| Is580             | Istanbul    | Turkey         | 1997      | Burn       | 30 | 3         | B108         | B03 | B1 | <i>exoS</i>   | NA                      | II a   | POS | NA                           | 4 |
| M-280             | Bucarest    | Romania        | 1965-1978 | Faeces     | 7  | 3         | B107         | B02 | A1 | <i>exoS</i>   | NA                      | II a   | POS | NA                           | 1 |
| M-79              | Bucarest    | Romania        | 1965-1978 | Urine      | 7  | NT        | B107         | B02 | A1 | <i>exoS</i>   | <i>TfpO<sub>b</sub></i> | II a   | POS | NA                           | 1 |
| 5BR2              | De Haan     | Belgium        | 1993      | CF-patient | 20 | NT        | C109         | B07 | B1 | <i>exoS</i>   | NA                      | II a   | POS | NA                           | 2 |
| C5311 (RAPD A097) | Vancouver   | Canada         | 2002      | CF-patient | 20 | NT        | B107         | B13 | B1 | <i>exoS</i>   | <i>TfpO<sub>b</sub></i> | II a   | POS | NA                           | 3 |
| TA04              | Hobart      | Australia      | 2003      | Foot ulcer | 20 | NT        | B107         | B07 | A1 | <i>exoS</i>   | <i>TfpO<sub>b</sub></i> | II a   | POS | NA                           | 1 |
| MC096             | Leuven      | Belgium        | 2003      | CF-patient | 20 | NT        | B106         | B12 | B1 | <i>exoS</i>   | <i>TfpO<sub>b</sub></i> | II a   | POS | NA                           | 0 |
| MC361 (green)     | Brussels    | Belgium        | 2003      | CF-patient | 20 | NT        | B107         | B02 | B1 | <i>exoS</i>   | NA                      | II a   | POS | NA                           | 1 |
| C3128 (RAPD A002) | Vancouver   | Canada         | 2002      | CF-patient | 21 | NT        | B106         | B02 | B1 | <i>exoS</i>   | NA                      | II a   | POS | NA                           | 2 |
| Br735 (AFLP 8)    | Brussels    | Belgium        | 1998      | Burn       |    | NT        | C204         | A05 | B1 | <i>exoS</i>   | NA                      | II a   | POS | PSE                          | 1 |
| Br680             | Brussels    | Belgium        | 1998      | Burn       |    | 12        | A201         | E01 | F1 | <i>exoS</i>   | <i>TfpO<sub>b</sub></i> | II b   | NA  | NA                           | 0 |
| AGO4092 (O11)     | Athens      | Greece         | 1994      | Urine      | 12 | 11        | C202         | B02 | B1 | <i>exoU</i>   | NA                      | II b   | POS | SHV, ANT(3'')-Ia, AAC(6')-Ib |   |
| PN1296(62)        | Panama City | Panama         | 2006      | Wound      |    | 11        | C202 (DOM21) | B02 | B1 | <i>exoU</i>   | NA                      | II a   | POS | TEM-like                     | 5 |
| PAO1              | Melbourne   | Australia      | 1955      | Wound      | 30 | 5         | C103         | B11 | A1 | <i>exoS</i>   | NA                      | I      | POS | NA                           | 1 |
| A18               | Paris       | France         | 1882-1918 | Leg ulcer  | 20 | 6         | B107         | B12 | C1 | <i>exoS</i>   | <i>TfpO<sub>b</sub></i> | I      | POS | NA                           | 1 |
| MC086             | Ghent       | Belgium        | 2003      | CF-patient | 20 | 6         | C106         | B02 | B1 | <i>exoS</i>   | <i>TfpO<sub>b</sub></i> | I      | POS | NA                           | 1 |
| TA05              | Hobart      | Australia      | 2003      | Sputum     | 26 | 6         | B107         | B12 | B1 | <i>exoS</i>   | <i>TfpO<sub>b</sub></i> | I      | POS | NA                           | 1 |
| Pr317             | Prague      | Czech Republic | 1996      | Burn       |    | 11        | C202 (DOM10) | B02 | B1 | <i>exoU</i>   | NA                      | II b   | POS | ANT(3'')-Ia, AAC(3)-IIa      |   |
| Br678             | Brussels    | Belgium        | 1998      | Burn       |    | 11        | C202 (DOM13) | B02 | B1 | <i>exoS+U</i> | NA                      | II b** | POS | PER-1/2                      | 5 |

|       |             |     |      |       |    |    |      |     |    |             |                         |      |     |            |   |
|-------|-------------|-----|------|-------|----|----|------|-----|----|-------------|-------------------------|------|-----|------------|---|
| Us450 | San Antonio | USA | 1993 | Burn  | 35 | 11 | C103 | B02 | B1 | <i>exoU</i> | <i>TfpO<sub>b</sub></i> | II a | POS | AAC(6')-Ib | 1 |
| Us365 | San Antonio | USA | 1986 | Wound | 35 | 11 | C202 | B02 | B1 | <i>exoU</i> | NA                      | II a | POS | AAC(6')-Ib | 0 |
| Bo559 | Boston      | USA | 1997 | Burn  |    | 1  | A103 | B06 | A1 | <i>exoU</i> | <i>TfpO<sub>b</sub></i> | I    | POS | NA         | 1 |

Table S2. *K. pneumoniae* strains list.

| #  | LMG number    | Original Name        | Place of origin           | Source of isolation | Capsule type | Virulence genes |
|----|---------------|----------------------|---------------------------|---------------------|--------------|-----------------|
| 1  | A110050       | 1711-040762          | Erazme Hospital, Brussels | Bone infection      | K20          | -               |
| 2  | A110046       | 025187127-1          | PTMC, CHU Nantes, France  | Burn infection      | N/A          | -               |
| 3  | 17d0862(1)    | -                    | UZGent                    | Burn wound          | K24          | -               |
| 4  | A210120       | 36336                | LHUB-ULB                  | Bone infection      | N/A          | -               |
| 5  | A210157       | ATCC 13883           | UZGent                    | -                   | K3           | -               |
| 6  | ATCC 27736    | ATCC 27736           | LabMCT                    | -                   | N/A          | -               |
| 7  | SB4551        | SB4551               | LabMCT                    | -                   | N/A          | -               |
| 8  | S4 4385       | S4 4385              | LabMCT                    | -                   | N/A          | -               |
| 9  | 130528/0682   | -                    | LabMCT                    | Nez                 | N/A          | -               |
| 10 | 121231/0018   | -                    | LabMCT                    | -                   | K3           | -               |
| 11 | 130306/0842   | -                    | LabMCT                    | -                   | K81          | -               |
| 12 | 110628/0752   | -                    | LabMCT                    | -                   | K14          | -               |
| 13 | 121120/0608   | -                    | LabMCT                    | -                   | K28          | -               |
| 14 | 080708/0488-2 | -                    | LabMCT                    | -                   | N/A          | -               |
| 15 | 21209/0028    | -                    | LabMCT                    | -                   | N/A          | -               |
| 16 | 110607/1254   | -                    | LabMCT                    | -                   | N/A          | -               |
| 17 | A310226       | 2101260700 _original | LabMCT                    | Peritoneal fluid    | N/A          | -               |
| 18 | A310229       | 121114/0502          | VUB, Zizi                 | Peritoneal fluid    | N/A          | -               |
| 19 | A310240       | 1D                   | HUDERF, Brussels          | Peritoneal fluid    | N/A          | -               |
| 20 | A310241       | 2D                   | HUDERF, Brussels          | Peritoneal fluid    | N/A          | -               |
| 21 | A310242       | 1C                   | HUDERF, Brussels          | Peritoneal fluid    | N/A          | -               |
| 22 | A310243       | 2C                   | HUDERF, Brussels          | Peritoneal fluid    | N/A          | -               |
| 23 | A310244       | 2103230964           | HUDERF, Brussels          | Peritoneal fluid    | N/A          | -               |
| 24 | A310245       | 2103230968           | HUDERF, Brussels          | Peritoneal fluid    | N/A          | -               |
| 25 | A310246       | 2103230970           | HUDERF, Brussels          | rectum              | N/A          | -               |
| 26 | A310247       | 2103230966           | HUDERF, Brussels          | rectum              | N/A          | -               |
| 27 | A310270       | 11819                | Saint Luc                 | rectum              | N/A          | -               |
| 28 | A310271       | 12063                | Saint Luc                 | rectum              | N/A          | -               |
| 29 | A310272       | 12146                | Saint Luc                 | rectum              | N/A          | -               |
| 30 | A310273       | 12307                | Saint Luc                 | rectum              | N/A          | -               |
| 31 | A310274       | 12351                | Saint Luc                 | rectum              | N/A          | -               |

|    |         |                          |                                    |                         |       |   |
|----|---------|--------------------------|------------------------------------|-------------------------|-------|---|
| 32 | A310275 | 12820                    | Saint Luc                          | rectum                  | N/A   | - |
| 33 | A310276 | 12894                    | Saint Luc                          | rectum                  | N/A   | - |
| 34 | A310277 | 13010                    | Saint Luc                          | rectum                  | N/A   | - |
| 35 | A310278 | 13021                    | Saint Luc                          | selles                  | N/A   | - |
| 36 | A310279 | 13231                    | Saint Luc                          | rectum                  | N/A   | - |
| 37 | A310280 | 13123                    | Saint Luc                          | selles                  | N/A   | - |
| 38 | A310281 | 13134                    | Saint Luc                          | selles                  | N/A   | - |
| 39 | A310282 | 13196                    | Saint Luc                          | rectum                  | N/A   | - |
| 40 | A310283 | 13345                    | Saint Luc                          | rectum                  | N/A   | - |
| 41 | A310284 | 13498                    | Saint Luc                          | rectum                  | N/A   | - |
| 42 | A310285 | 13571                    | Saint Luc                          | rectum                  | N/A   | - |
| 43 | A310286 | 13765                    | Saint Luc                          | rectum                  | N/A   | - |
| 44 | A310287 | 14076                    | Saint Luc                          | rectum                  | N/A   | - |
| 45 | A310288 | 14094                    | Saint Luc                          | rectum                  | N/A   | - |
| 46 | A310289 | 14506                    | Saint Luc                          | rectum                  | N/A   | - |
| 47 | A310290 | 14977                    | Saint Luc                          | rectum                  | N/A   | - |
| 48 | A310291 | 14987                    | Saint Luc                          | rectum                  | N/A   | - |
| 49 | A310292 | 15102                    | Saint Luc                          | rectum                  | N/A   | - |
| 50 | A310293 | CPE199                   | Saint Luc                          | rectum                  | N/A   | - |
| 51 | A310294 | CPE262                   | Saint Luc                          | rectum                  | N/A   | - |
| 52 | A310295 | CPE293                   | Saint Luc                          | carriage before surgery |       | - |
| 53 | A310296 | CPE357                   | Saint Luc                          | -                       | N/A   | - |
| 54 | A310360 | OPTICS 1 Kp              | UCL                                | -                       | N/A   | - |
| 55 | 10383   | 60fe7b3cd37098409a7e71e0 | Universitats Klinikum Jena Germany | -                       | K62   | - |
| 56 | 10384   | 60fe7b3cd37098409a7e71e3 | Universitats Klinikum Jena Germany | -                       | K62   | - |
| 57 | 10385   | 60fe7b3cd37098409a7e71e5 | Universitats Klinikum Jena Germany | -                       | K4    | - |
| 58 | 10386   | 60fe7b3cd37098409a7e71e8 | Universitats Klinikum Jena Germany | -                       | K2    | - |
| 59 | 10387   | 60fe7b3cd37098409a7e71ed | Universitats Klinikum Jena Germany | -                       | K62   | - |
| 60 | 10388   | 60fe7b3cd37098409a7e71ef | Universitats Klinikum Jena Germany | -                       | KL112 | - |
| 61 | 10389   | 60fe7b3cd37098409a7e71f0 | Universitats Klinikum Jena Germany | -                       | K4    | - |
| 62 | 10390   | 60fe7b3cd37098409a7e71f1 | Universitats Klinikum Jena Germany | -                       | K24   | - |
| 63 | 10391   | 60fe7b3cd37098409a7e71f6 | Universitats Klinikum Jena Germany | -                       | K62   | - |

|    |       |                          |                                       |   |       |   |
|----|-------|--------------------------|---------------------------------------|---|-------|---|
| 64 | 10392 | 60fe7b3cd37098409a7e71f8 | Universitäts Klinikum Jena<br>Germany | - | K2    | - |
| 65 | 10393 | 60fe7b3cd37098409a7e71f9 | Universitäts Klinikum Jena<br>Germany | - | K62   | - |
| 66 | 10394 | 60fe7b3cd37098409a7e71fa | Universitäts Klinikum Jena<br>Germany | - | K62   | - |
| 67 | 10395 | 60fe7b3cd37098409a7e71fc | Universitäts Klinikum Jena<br>Germany | - | K74   | - |
| 68 | 10396 | 60fe7b3cd37098409a7e7200 | Universitäts Klinikum Jena<br>Germany | - | KL112 | - |
| 69 | 10397 | 60fe7b3cd37098409a7e7205 | Universitäts Klinikum Jena<br>Germany | - | K2    | - |
| 70 | 10398 | 60fe7b3cd37098409a7e7206 | Universitäts Klinikum Jena<br>Germany | - | KL112 | - |
| 71 | 10399 | 60fe7b3cd37098409a7e7207 | Universitäts Klinikum Jena<br>Germany | - | KL112 | - |
| 72 | 10400 | 60fe7b3cd37098409a7e7208 | Universitäts Klinikum Jena<br>Germany | - | K74   | - |
| 73 | 10401 | 60fe7b3cd37098409a7e7209 | Universitäts Klinikum Jena<br>Germany | - | K2    | - |
| 74 | 10402 | 60fe7b3cd37098409a7e721d | Universitäts Klinikum Jena<br>Germany | - | KL107 | - |
| 75 | 10403 | 60fe7b3cd37098409a7e721e | Universitäts Klinikum Jena<br>Germany | - | K62   | - |
| 76 | 10404 | 60fe7b3cd37098409a7e7225 | Universitäts Klinikum Jena<br>Germany | - | K68   | - |
| 77 | 10405 | 60fe7b3cd37098409a7e722b | Universitäts Klinikum Jena<br>Germany | - | K38   | - |
| 78 | 10406 | 60fe7b3cd37098409a7e722e | Universitäts Klinikum Jena<br>Germany | - | KL107 | - |
| 79 | 10407 | 60fe7b3cd37098409a7e723d | Universitäts Klinikum Jena<br>Germany | - | KL112 | - |
| 80 | 10408 | 60fe7b3cd37098409a7e71e2 | Universitäts Klinikum Jena<br>Germany | - | KL120 | - |
| 81 | 10409 | 60fe7b3cd37098409a7e7245 | Universitäts Klinikum Jena<br>Germany | - | KL102 | - |
| 82 | 10410 | 60fe82b3d37098409a7e726d | Universitäts Klinikum Jena<br>Germany | - | K24   | - |
| 83 | 10411 | 60fe82b3d37098409a7e725c | Universitäts Klinikum Jena<br>Germany | - | KL108 | - |
| 84 | 10412 | 60fe82b3d37098409a7e725b | Universitäts Klinikum Jena<br>Germany | - | K17   | - |
| 85 | 10413 | 60fe82b3d37098409a7e725a | Universitäts Klinikum Jena<br>Germany | - | KL105 | - |
| 86 | 10414 | 60fe82b3d37098409a7e7259 | Universitäts Klinikum Jena<br>Germany | - | KL108 | - |

|     |       |                          |                                       |   |          |   |
|-----|-------|--------------------------|---------------------------------------|---|----------|---|
| 87  | 10415 | 60fe82b3d37098409a7e7258 | Universitäts Klinikum Jena<br>Germany | - | K17      | - |
| 88  | 10416 | 60fe82b3d37098409a7e7257 | Universitäts Klinikum Jena<br>Germany | - | KL105    | - |
| 89  | 10417 | 60fe82b3d37098409a7e725e | Universitäts Klinikum Jena<br>Germany | - | K24      | - |
| 90  | 10418 | 60fe82b3d37098409a7e7250 | Universitäts Klinikum Jena<br>Germany | - | K17      | - |
| 91  | 10419 | 60fe82b3d37098409a7e724f | Universitäts Klinikum Jena<br>Germany | - | KL106    | - |
| 92  | 10420 | 60fe82b3d37098409a7e7256 | Universitäts Klinikum Jena<br>Germany | - | KL105    | - |
| 93  | 10421 | 60fe82b3d37098409a7e7255 | Universitäts Klinikum Jena<br>Germany | - | K64      | - |
| 94  | 10422 | 60fe82b3d37098409a7e7254 | Universitäts Klinikum Jena<br>Germany | - | K2       | - |
| 95  | 10423 | 60fe82b3d37098409a7e7253 | Universitäts Klinikum Jena<br>Germany | - | KL156-D1 | - |
| 96  | 10424 | 60fe82b3d37098409a7e726e | Universitäts Klinikum Jena<br>Germany | - | K30      | - |
| 97  | 10425 | 60fe82b3d37098409a7e726c | Universitäts Klinikum Jena<br>Germany | - | K45      | - |
| 98  | 10426 | 60fe82b3d37098409a7e726b | Universitäts Klinikum Jena<br>Germany | - | KL156-D1 | - |
| 99  | 10427 | 60fe82b3d37098409a7e726a | Universitäts Klinikum Jena<br>Germany | - | K55      | - |
| 100 | 10428 | 60fe7b3cd37098409a7e724c | Universitäts Klinikum Jena<br>Germany | - | K5       | - |
| 101 | 10429 | 60fe7b3cd37098409a7e724d | Universitäts Klinikum Jena<br>Germany | - | K57      | - |
| 102 | 10430 | 60fe7b3cd37098409a7e724e | Universitäts Klinikum Jena<br>Germany | - | K38      | - |
| 103 | 10431 | 61375150a181bb3680e24dc3 | Universitäts Klinikum Jena<br>Germany | - | K16      | - |
| 104 | 10432 | 619e0fe79f46174c9eed71e1 | Universitäts Klinikum Jena<br>Germany | - | K17      | - |
| 105 | 10433 | 619e0fe79f46174c9eed71e2 | Universitäts Klinikum Jena<br>Germany | - | KL102    | - |
| 106 | 10434 | 619e0fe79f46174c9eed71e3 | Universitäts Klinikum Jena<br>Germany | - | KL107    | - |
| 107 | 10435 | 619e0fe79f46174c9eed71e4 | Universitäts Klinikum Jena<br>Germany | - | KL102    | - |
| 108 | 10436 | 619e0fe79f46174c9eed71e5 | Universitäts Klinikum Jena<br>Germany | - | K24      | - |
| 109 | 10437 | 619e0fe79f46174c9eed71e6 | Universitäts Klinikum Jena<br>Germany | - | K17      | - |



|     |            |                          |                                       |   |                          |                            |
|-----|------------|--------------------------|---------------------------------------|---|--------------------------|----------------------------|
| 110 | 10438      | 619e0fe79f46174c9eed71e7 | Universitäts Klinikum Jena<br>Germany | - | K17                      | -                          |
| 111 | 10439      | 619e0fe79f46174c9eed71e8 | Universitäts Klinikum Jena<br>Germany | - | KL141                    | -                          |
| 112 | 10440      | 619e0fe79f46174c9eed71ea | Universitäts Klinikum Jena<br>Germany | - | K2                       | -                          |
| 113 | 10441      | 619e0fe79f46174c9eed71eb | Universitäts Klinikum Jena<br>Germany | - | KL106                    | -                          |
| 114 | 10442      | 619e0fe79f46174c9eed71ec | Universitäts Klinikum Jena<br>Germany | - | KL156-D1                 | -                          |
| 115 | 106 KPK2   | 10924                    | University of Jyväskylä (FIN)         | - | N/A                      | mrK                        |
| 116 | 107 KPK3   | 70165                    | University of Jyväskylä (FIN)         | - | K2                       | irp, fyu, ybt, kfu,<br>mrk |
| 117 | 108 KPK4   | 70415                    | University of Jyväskylä (FIN)         | - | K2                       | mrk                        |
| 118 | 109 KPK5   | 70708                    | University of Jyväskylä (FIN)         | - | N/A<br>(K15K17K50K51K52) | mrk                        |
| 119 | 110 KPK6   | 71076                    | University of Jyväskylä (FIN)         | - | K17                      | irp, mrk, fyu, ybt,<br>kfu |
| 120 | 111 KPK7   | 2008024                  | University of Jyväskylä (FIN)         | - | K2                       | mrk, kfu                   |
| 121 | 112 KPK8   | 2008025                  | University of Jyväskylä (FIN)         | - | K13                      | mrk                        |
| 122 | 113 KPK10  | AO-8053                  | University of Jyväskylä (FIN)         | - | N/A                      | mrk                        |
| 123 | 114 KPK11  | AO-15200                 | University of Jyväskylä (FIN)         | - | K64,K14                  | mrk                        |
| 124 | 115 KPK13  | VPKP267                  | University of Jyväskylä (FIN)         | - | K64,K15                  | mrk                        |
| 125 | 116 KPK14  | VPKP205                  | University of Jyväskylä (FIN)         | - | K25                      | irp, mrk, ybt              |
| 126 | 117 KPK15  | VPKP284                  | University of Jyväskylä (FIN)         | - | K21                      | fyu, ybt, all, arc, glx    |
| 127 | 118 KPK16  | VPKP374                  | University of Jyväskylä (FIN)         | - | k2                       | irp, fyu, ybt, mrk         |
| 128 | 119 KPK17  | VPKP430                  | University of Jyväskylä (FIN)         | - | k3                       | irp, fyu, ybt, kfu,<br>mrk |
| 129 | 120 KPK18  | VPKP389                  | University of Jyväskylä (FIN)         | - | k27                      | irp, mrk, fyu, ybt         |
| 130 | 121 KPK20  | VPKP229                  | University of Jyväskylä (FIN)         | - | k25                      | irp, mrk, ybt              |
| 131 | 122 KPK24  | ED502873                 | University of Jyväskylä (FIN)         | - | N/A<br>(K15K17K50K51K52) | irp, mrk, fyu, ybt         |
| 132 | 123 KPK25  | N12                      | University of Jyväskylä (FIN)         | - | K51                      | kfu, mrk                   |
| 133 | 124 KPK3r2 | -                        | University of Jyväskylä (FIN)         | - | N/A                      | -                          |
| 134 | 125 PT-KP1 | -                        | University of Jyväskylä (FIN)         | - | N/A                      | -                          |
| 135 | 126 PT-KP2 | -                        | University of Jyväskylä (FIN)         | - | N/A                      | -                          |
| 136 | 127 PT-KP3 | -                        | University of Jyväskylä (FIN)         | - | N/A                      | -                          |
| 137 | 128 PT-KP4 | -                        | University of Jyväskylä (FIN)         | - | N/A                      | -                          |
| 138 | 129 PT-KP5 | -                        | University of Jyväskylä (FIN)         | - | N/A                      | -                          |
| 139 | 130 PT-KP8 | -                        | University of Jyväskylä (FIN)         | - | N/A                      | -                          |

|     |             |      |                               |   |                 |   |
|-----|-------------|------|-------------------------------|---|-----------------|---|
| 140 | 131 PT-KP11 | -    | University of Jyväskylä (FIN) | - | N/A             | - |
| 141 | 132 PT-KP12 | -    | University of Jyväskylä (FIN) | - | N/A             | - |
| 142 | 133 PT-KP13 | -    | University of Jyväskylä (FIN) | - | N/A             | - |
| 143 | 134 PT-KP14 | -    | University of Jyväskylä (FIN) | - | N/A             | - |
| 144 | 135 KP2r2   | -    | University of Jyväskylä (FIN) | - | N/A             | - |
| 145 | 136 KP2r3   | -    | University of Jyväskylä (FIN) | - | N/A             | - |
| 146 | 137 KP2r4   | -    | University of Jyväskylä (FIN) | - | N/A             | - |
| 147 | 138 NKP1    | -    | University of Jyväskylä (FIN) | - | N/A             | - |
| 148 | 139 NKP2    | -    | University of Jyväskylä (FIN) | - | N/A             | - |
| 149 | 140 NKP20   | -    | University of Jyväskylä (FIN) | - | N/A             | - |
| 150 | 141 EKP3    | -    | University of Jyväskylä (FIN) | - | N/A             | - |
| 151 | 142 EKP8    | -    | University of Jyväskylä (FIN) | - | N/A             | - |
| 152 | 143 EKP10   | -    | University of Jyväskylä (FIN) | - | N/A             | - |
| 153 | 144 EKP11   | -    | University of Jyväskylä (FIN) | - | N/A             | - |
| 154 | 145 PT-KO1  | -    | University of Jyväskylä (FIN) | - | N/A             | - |
| 155 | 146 KPK1    | 1534 | University of Jyväskylä (FIN) | - | K15K17K50K51K52 | - |

Table S3. Characteristics and interpretation of OmniLog propagation curves for combinations of *P. aeruginosa* strains and individual phages and phage cocktails.

| <b>P. aeruginosa</b><br><b>Strain</b><br><b>rru</b><br><b>Characteristics/p</b><br><b>arameters</b> | <b><u>Cocktail 1</u></b><br><b>Phage</b><br><b>Components</b> | <b><u>Cocktail 2</u></b><br><b>Phage</b><br><b>components</b> | <b><u>Cocktail 3</u></b><br><b>Phage</b><br><b>components</b> | <b><u>Cocktail 4</u></b><br><b>Phage</b><br><b>components</b> | <b><u>Cocktail 5</u></b><br><b>Phage</b><br><b>components</b> | <b><u>Cocktail 6</u></b><br><b>Phage</b><br><b>components</b> | <b><u>Cocktail 7</u></b><br><b>Phage</b><br><b>components</b> |
|-----------------------------------------------------------------------------------------------------|---------------------------------------------------------------|---------------------------------------------------------------|---------------------------------------------------------------|---------------------------------------------------------------|---------------------------------------------------------------|---------------------------------------------------------------|---------------------------------------------------------------|
| <b>PAO1K</b><br><b>221 rru</b>                                                                      | Cl-32h<br>161 rru                                             | Cl-42h<br>135 rru                                             | Cl-48h                                                        | In-48h<br>135 rru                                             | Cl-48h                                                        | Cl-48h                                                        | Cl-30h<br>PRM, 235 rru                                        |
| <b>O5-serotype</b><br><b>T3SS</b><br><b>ExoS</b><br><b>oprI A1 oprL</b><br><b>B11</b>               | Atpa001<br>Cl-12h<br>PRM,<br>319 rru                          | Atpa001<br>Cl-12h<br>PRM,<br>319 rru                          | Atpa005<br>Cl-28h<br>PRMM,<br>283 rru                         | Atpa008<br>Cl-10h<br>208 rru                                  | Atpa010<br>Cl-48h                                             | Atpa012<br>Cl-8h<br>PRM,<br>302 rru                           | Qatpa008<br>Cl-30h<br>PRM,<br>245 rru                         |
|                                                                                                     | Atpa002<br>Cl-24h<br>PRM, 265 rru                             | Atpa003<br>Cl-12h<br>PRM, 248 rru                             | Atpa006<br>Cl-28h<br>237 rru                                  | Atpa009<br>Cl-24h<br>PRM, 307 rru                             | Atpa011<br>Cl-48h                                             | Atpa013<br>Cl-12h<br>PRM, 285 rru                             | Qatpa009<br>Cl-12h<br>PRM, 301 rru                            |
|                                                                                                     | Atpa003<br>Cl-12h<br>PRM, 248 rru                             | Atpa004<br>Cl-28h<br>PRM, 341 rru                             | n/a                                                           | n/a                                                           | n/a                                                           | Atpa014<br>Cl-16h<br>235 rru                                  | Qatpa010<br>Cl-16h<br>PRM, 307 rru                            |
|                                                                                                     |                                                               |                                                               |                                                               |                                                               |                                                               |                                                               |                                                               |

| <b>Interpratation</b>                         | <u>Synergy:</u><br>Increased clearing effect timing. | <u>Synergy:</u><br>Increased clearing effect timing.             | <u>Synergy:</u><br>Increased clearing effect timing.             | <u>Antagonism or not sufficient pfu/ml:</u><br>Shorten clearing effect timing. | <u>Proto-cooperation:</u><br>Clearing effect timing is the same. | <u>Synergy:</u><br>Increased clearing effect timing. | <u>Proto-cooperation:</u><br>Clearing effect timing is the same.              |
|-----------------------------------------------|------------------------------------------------------|------------------------------------------------------------------|------------------------------------------------------------------|--------------------------------------------------------------------------------|------------------------------------------------------------------|------------------------------------------------------|-------------------------------------------------------------------------------|
| <b>PAO1 M, 208 rru</b>                        | Cl-48h                                               | ndh                                                              | Cl-48h                                                           | ndh                                                                            | ndh                                                              | ndh                                                  | ndh                                                                           |
| <b>O5-serotype T3SS ExoS oprI A1 oprL B11</b> | Atpa001 Cl-6h 231 rru                                | ndh                                                              | Atpa005 Cl-15h 199 rru                                           | ndh                                                                            | ndh                                                              | ndh                                                  | ndh                                                                           |
|                                               | Atpa002 Cl-12h 188 rru                               | ndh                                                              | Atpa006 Cl-8h PRM, 188 rru                                       | ndh                                                                            | ndh                                                              | ndh                                                  | ndh                                                                           |
|                                               | Atpa003 Cl-8h PRM, 294 rru                           | ndh                                                              | n/a                                                              | ndh                                                                            | ndh                                                              | ndh                                                  | ndh                                                                           |
| <b>Interpratation</b>                         | <u>Synergy:</u><br>Increased clearing effect timing. | -                                                                | <u>Synergy:</u><br>Increased clearing effect timing.             | ndh                                                                            | ndh                                                              | ndh                                                  | ndh                                                                           |
| <b>CN573 222 rru</b>                          | Cl-48h                                               | Cl-48h                                                           | Cl-48h                                                           | Cl-48h                                                                         | Cl-48h                                                           | Cl-48h                                               | Cl-20h 187 rru                                                                |
| <b>O1-serotype oprI B1 oprL B09 ExoS</b>      | Atpa001 Cl-28h 234 rru                               | Atpa001 Cl-28h 234 rru                                           | Atpa005 Cl-48h                                                   | Atpa008 Cl-18h 189 rru                                                         | Atpa010 Cl-48h                                                   | Atpa012 ln-36h 204 rru                               | Qatpa008 Cl-28h 122 rru                                                       |
|                                               | Atpa002 Cl-36h 225 rru                               | Atpa003 Cl-28h PRM, 265 rru                                      | Atpa006 Cl-48h                                                   | Atpa009 Cl-48h                                                                 | Atpa011 Cl-48h                                                   | Atpa013 Cl-30h PRM, 248 rru                          | Qatpa009 Cl-12h PRM, 252 rru                                                  |
|                                               | Atpa003 Cl-28h PRM, 265 rru                          | Atpa004 Cl-48h                                                   | n/a                                                              | n/a                                                                            | n/a                                                              | Atpa014 Cl-14h 265 rru                               | Qatpa010 Cl-48h                                                               |
| <b>Interpratation</b>                         | <u>Synergy:</u><br>Increased clearing effect timing. | <u>Proto-cooperation:</u><br>Clearing effect timing is the same. | <u>Proto-cooperation:</u><br>Clearing effect timing is the same. | <u>Proto-cooperation:</u><br>Clearing effect timing is the same.               | <u>Proto-cooperation:</u><br>Clearing effect timing is the same. | <u>Synergy:</u><br>Increased clearing effect timing. | <u>Antagonism or not sufficient pfu/ml:</u><br>Shorten clearing effect timing |
| <b>PAV237 228 rru</b>                         | Cl-20h M, 255 rru                                    | Cl-48h                                                           | Cl-48h                                                           | Cl-48h                                                                         | Cl-48h                                                           | Cl-48h                                               | Cl-8h PRM, 296 rru                                                            |
|                                               | Atpa001 Cl-20h                                       | Atpa001 Cl-20h                                                   | Atpa005 Cl-48h                                                   | Atpa008 Cl-12h                                                                 | Atpa010 Cl-14h                                                   | Atpa012 Cl-6h                                        | Qatpa008 Cl-20h PRM, 271 rru                                                  |

|                                                   |                                                                  |                                                                  |                                                                  |                                                                  |                                                                  |                                                                  |                                                                               |
|---------------------------------------------------|------------------------------------------------------------------|------------------------------------------------------------------|------------------------------------------------------------------|------------------------------------------------------------------|------------------------------------------------------------------|------------------------------------------------------------------|-------------------------------------------------------------------------------|
| <i>lasB</i> gene coding for elastase B            | 224 rru                                                          | 224 rru                                                          |                                                                  | 213 rru                                                          | 209 rru                                                          | 220 rru                                                          |                                                                               |
|                                                   | Atpa002<br>Cl-10h<br>PRM, 263 rru                                | Atpa003<br>Cl-10h<br>PRM, 285 rru                                | Atpa006<br>Cl-12h<br>193 rru                                     | Atpa009<br>Cl-48h                                                | Atpa011<br>Cl-48h                                                | Atpa013<br>Cl-10h<br>179 rru                                     | Qatpa009 Cl-8h<br>PRM, 295 rru                                                |
|                                                   | Atpa003<br>Cl-10h<br>PRM, 285 rru                                | Atpa004<br>Cl-48h                                                | n/a                                                              | n/a                                                              | n/a                                                              | Atpa014<br>Cl-48h                                                | Qatpa010 Cl-14h<br>209 rru                                                    |
|                                                   |                                                                  |                                                                  |                                                                  |                                                                  |                                                                  |                                                                  |                                                                               |
| Interpratation                                    | <u>Proto-cooperation:</u><br>Clearing effect timing is the same. | <u>Antagonism or not sufficient pfu/ml:</u><br>Shorten clearing effect timing |
| PA14<br>185 rru                                   | ndh                                                              | ndh                                                              | Cl-48h                                                           | ndh                                                              | Cl-48h                                                           | ndh                                                              | ndh                                                                           |
| O10-serotype,<br>oprI B1 oprL<br>A05 T3SS<br>ExoU | ndh                                                              | ndh                                                              | Atpa005<br>Cl-6h<br>180 rru                                      | ndh                                                              | Atpa010<br>Cl-12h<br>193 rru                                     | ndh                                                              | ndh                                                                           |
|                                                   | -                                                                | -                                                                | Atpa006<br>Cl-24h<br>M, 245 rru                                  | -                                                                | Atpa011<br>Cl-26h<br>M, 193 rru                                  | -                                                                | -                                                                             |
| Interpratation                                    | -                                                                | -                                                                | <u>Synergy:</u><br>Increased clearing effect timing.             | -                                                                | <u>Synergy:</u><br>Increased clearing effect timing.             | -                                                                | -                                                                             |
| Is573<br>248 rru                                  | ndh                                                              | ndh                                                              | ndh                                                              | ndh                                                              | ndh                                                              | Cl-48h                                                           | Cl-30h<br>M, 205rru                                                           |
| O11-serotype,<br>oprI B1 oprL<br>B02 ExoU         | ndh                                                              | ndh                                                              | ndh                                                              | ndh                                                              | ndh                                                              | Atpa012<br>Cl-6h<br>239 rru                                      | Qatpa008<br>Cl-16h<br>225 rru                                                 |
|                                                   | ndh                                                              | ndh                                                              | ndh                                                              | ndh                                                              | ndh                                                              | Atpa013<br>Cl-8h<br>257 rru                                      | Qatpa009 Cl-14h<br>242 rru                                                    |
|                                                   | ndh                                                              | ndh                                                              | ndh                                                              | ndh                                                              | ndh                                                              | Atpa014<br>Cl-48h                                                | Qatpa010 Cl-8h<br>249 rru                                                     |
| Interpratation                                    | -                                                                | -                                                                | -                                                                | -                                                                | -                                                                | <u>Protocooperation:</u><br>Clearing effect timing is the same.  | <u>Synergy:</u><br>Increased clearing effect timing.                          |
| A11<br>241 rru                                    | Cl-28h<br>216 rru                                                | ndh                                                              | ndh                                                              | ndh                                                              | Cl-30h<br>210 rru                                                | ndh                                                              | ndh                                                                           |
| oprI B1 oprL<br>B12                               | Atpa001<br>Cl-0h                                                 | ndh                                                              | ndh                                                              | ndh                                                              | Atpa010<br>Cl-6h                                                 | ndh                                                              | ndh                                                                           |

|                                                        |                                                            |                                                     |                         |                                                         |                                                                       |                                |                                                     |
|--------------------------------------------------------|------------------------------------------------------------|-----------------------------------------------------|-------------------------|---------------------------------------------------------|-----------------------------------------------------------------------|--------------------------------|-----------------------------------------------------|
| ExoS                                                   | 250 rru                                                    |                                                     |                         |                                                         | 250 rru                                                               |                                |                                                     |
|                                                        | Atpa002<br>CI-6h<br>198 rru                                | ndh                                                 | ndh                     | ndh                                                     | Atpa011<br>CI-26h<br>252 rru                                          | ndh                            | ndh                                                 |
|                                                        | Atpa003<br>CI-8h<br>197 rru                                | ndh                                                 | ndh                     | ndh                                                     | ndh                                                                   | ndh                            | ndh                                                 |
| Interpratation                                         | <u>Synergy:</u><br>Increased<br>clearing effect<br>timing. | ndh                                                 | ndh                     | ndh                                                     | <u>Synergy:</u><br>Increased clearing<br>effect timing.               | ndh                            | ndh                                                 |
| Is580<br>222 rru                                       | ndh                                                        | ndh                                                 | ndh                     | CI-44h<br>148 rru                                       | CI-48h                                                                | ndh                            | ndh                                                 |
| O3-serotype<br>oprI B1 oprL<br>B03 ExoS                | ndh                                                        | ndh                                                 | ndh                     | Atpa008<br>CI-6h<br>188 rru                             | Atpa010<br>CI-10h<br>213 rru                                          | ndh                            | ndh                                                 |
|                                                        | ndh                                                        | ndh                                                 | ndh                     | Atpa009<br>CI-10h<br>193 rru                            | Atpa011<br>CI-48h                                                     | ndh                            | ndh                                                 |
| Interpratation                                         | ndh                                                        | ndh                                                 | ndh                     | <u>Synergy:</u><br>Increased clearing<br>effect timing. | <u>Protocooperation:</u><br>Clearing effect<br>timing is the<br>same. | ndh                            | ndh                                                 |
| PA7<br>261 rru                                         | CI-10h<br>246 rru                                          | -<br>PRM<br>298 rru                                 | -<br>212 rru            | -<br>PRM<br>283 rru                                     | CI-14h<br>PRM<br>296 rru                                              | CI-8h<br>247 rru               | CI-10h<br>PRM<br>297 rru                            |
| MDR<br>O12-serotype<br>TPS<br>ExlA<br>oprI F1 oprL E03 | Atpa001<br>-<br>280 rru                                    | Atpa001<br>-<br>280 rru                             | Atpa005<br>-<br>256 rru | Atpa008<br>-<br>236 rru                                 | Atpa010<br>-<br>PRM<br>275 rru                                        | Atpa012<br>-<br>PRM<br>287 rru | Qatpa008<br>CI-20h<br>275 rru                       |
|                                                        | Atpa002<br>-<br>255 rru                                    | Atpa003<br>284 rru                                  | Atpa006<br>-<br>208 rru | Atpa009<br>-<br>227 rru                                 | Atpa011<br>-<br>CI-14h                                                | Atpa013<br>-<br>PRM<br>288 rru | Qatpa009<br>-<br>236 rru                            |
|                                                        | Atpa003<br>-<br>284 rru                                    | Atpa004<br>-<br>265 rru                             | n/a                     | n/a                                                     | n/a                                                                   | Atpa014<br>CI-8h<br>274 rru    | Qatpa010<br>CI-10h<br>297 rru                       |
|                                                        |                                                            |                                                     |                         |                                                         |                                                                       |                                |                                                     |
| Interpratation                                         | <u>Synergy:</u><br>clearing effect<br>timing for 10h.      | <u>Antagonism or<br/>not sufficient<br/>pfu/ml:</u> | -                       | <u>Antagonism or<br/>not sufficient<br/>pfu/ml:</u>     | <u>Protocooperation:</u>                                              | <u>Protocooperation:</u>       | <u>Antagonism or<br/>not sufficient<br/>pfu/ml:</u> |

|                                 |               |               |                                                                                      |                                     |                                 |
|---------------------------------|---------------|---------------|--------------------------------------------------------------------------------------|-------------------------------------|---------------------------------|
| could be not sufficient pfu/ml. | Increased rru | Increased rru | Clearing effect timing is the same.<br>But with PRM, could be not sufficient pfu/ml. | Clearing effect timing is the same. | Shorten clearing effect timing. |
|---------------------------------|---------------|---------------|--------------------------------------------------------------------------------------|-------------------------------------|---------------------------------|

Table S4. Characteristics and interpretation of OmniLog propagation curves for combinations of *K. pneumoniae* strains and individual phages and phage cocktails.

| <b>K. pneumoniae strains/<br/>Capsule type</b> | <b><u>Cocktail 1</u><br/>Phage components</b>                    | <b><u>Cocktail 2</u><br/>Phage components</b>                    | <b><u>Cocktail 3</u><br/>Phage components</b>                    | <b><u>Cocktail 4</u><br/>Phage components</b>                    | <b><u>Cocktail 5</u><br/>Phage components</b>                    | <b><u>Cocktail 6</u><br/>Phage components</b>                    | <b><u>Cocktail 7</u><br/>Phage components</b>                    |
|------------------------------------------------|------------------------------------------------------------------|------------------------------------------------------------------|------------------------------------------------------------------|------------------------------------------------------------------|------------------------------------------------------------------|------------------------------------------------------------------|------------------------------------------------------------------|
| <b>0682<br/>192 rru</b>                        | CI-48h                                                           | CI-48h                                                           | CI-48h                                                           | CI-48h                                                           | CI-48h                                                           | CI-48h                                                           | CI-48h<br>196 rru                                                |
| <b>K81</b>                                     | Atkp001 In-48h<br>163 rru                                        | Atkp001 In-48h<br>163 rru                                        | Atkp004 CI-48h                                                   | Atkp007 In-48h<br>136 rru                                        | Atkp009 CI-48h                                                   | Atkp012: CI-48h                                                  | Atkp014: CI-48h                                                  |
|                                                | Atkp008 In-48h<br>16 rru                                         | Atkp009 In-48h<br>106 rru                                        | Atkp006 In-48h<br>180 rru                                        | Atkp008 In-48h<br>116 rru                                        | Atkp010 In-48h                                                   | Atkp016: CI-48h                                                  | Atkp015: In-48h<br>112 rru                                       |
|                                                | n/a                                                              | n/a                                                              | n/a                                                              | n/a                                                              | n/a                                                              | n/a                                                              | Atkp016: CI-48h                                                  |
| <b>Interpratation</b>                          | <u>Proto-cooperation:</u><br>Clearing effect timing is the same. |
| <b>atcc27736<br/>250 rru</b>                   | ndh                                                              | IN-8h<br>178 rru                                                 | ndh                                                              | ndh                                                              | ndh                                                              | CI-48h                                                           | CI-48h                                                           |
| <b>Serotype-30</b>                             | ndh                                                              | Atkp001 CI-0h<br>250 rru                                         | ndh                                                              | ndh                                                              | ndh                                                              | Atkp012: CI-48h                                                  | Atkp014: CI-12h<br>218 rru                                       |
|                                                | ndh                                                              | Atkp009 CI-0h<br>250 rru                                         | ndh                                                              | ndh                                                              | ndh                                                              | Atkp016: CI-48h                                                  | Atkp015: CI-0h                                                   |
|                                                | ndh                                                              | n/a                                                              | ndh                                                              | ndh                                                              | ndh                                                              | n/a                                                              | Atkp016: CI-48h                                                  |
| <b>Interpratation</b>                          | ndh                                                              | <u>Synergy:</u><br>Increased clearing effect timing.             | ndh                                                              | ndh                                                              | ndh                                                              | <u>Proto-cooperation:</u><br>Clearing effect timing is the same. | <u>Synergy:</u><br>Increased clearing effect timing.             |

|                                |     |                             |                            |                              |                              |                                                                             |                                                                             |
|--------------------------------|-----|-----------------------------|----------------------------|------------------------------|------------------------------|-----------------------------------------------------------------------------|-----------------------------------------------------------------------------|
| <b>nctc13438<br/>272 rru</b>   | ndh | ndh                         | ndh                        | ndh                          | ndh                          | Cl-48h                                                                      | Cl-48h                                                                      |
| <b>carbapenemase<br/>KPC-3</b> | ndh | ndh                         | ndh                        | ndh                          | ndh                          | Atkp012 Cl-0h                                                               | Atkp014 Cl-0h                                                               |
|                                | ndh | ndh                         | ndh                        | ndh                          | ndh                          | Atkp016<br>Cl-16h<br>201 rru                                                | Atkp015 Cl-0h                                                               |
|                                | ndh | ndh                         | ndh                        | ndh                          | ndh                          | n/a                                                                         | Atkp016 Cl-16h<br>201 rru                                                   |
| <b>Interpratation</b>          | ndh | ndh                         | ndh                        | ndh                          | ndh                          | <u>Synergy:</u><br>Increased<br>clearing effect<br>timing.                  | <u>Synergy:</u><br>Increased<br>clearing effect<br>timing.                  |
| <b>SB4385<br/>255 rru</b>      | ndh | ndh                         | ndh                        | ndh                          | ndh                          | Cl-48h                                                                      | Cl-48h                                                                      |
| <b>K1</b>                      | ndh | ndh                         | ndh                        | ndh                          | ndh                          | Atkp012<br>Cl-6h                                                            | Atkp014<br>Cl-0h                                                            |
|                                | ndh | ndh                         | ndh                        | ndh                          | ndh                          | Atkp016 Cl-48h                                                              | Atkp015 Cl-0h                                                               |
|                                | ndh | ndh                         | ndh                        | ndh                          | ndh                          | n/a                                                                         | Atkp016 Cl-48h                                                              |
| <b>Interpratation</b>          | ndh | ndh                         | ndh                        | ndh                          | ndh                          | <u>Proto-<br/>cooperation:</u><br>Clearing effect<br>timing is the<br>same. | <u>Proto-<br/>cooperation:</u><br>Clearing effect<br>timing is the<br>same. |
| <b>10394<br/>265 rru</b>       | ndh | ndh                         | ndh                        | ndh                          | ndh                          | In-48h<br>206 rru                                                           | In-48h<br>185 rru                                                           |
| <b>K62</b>                     | ndh | ndh                         | ndh                        | ndh                          | ndh                          | Atkp012 Cl-0h                                                               | Atkp014 Cl-0h                                                               |
|                                | ndh | ndh                         | ndh                        | ndh                          | ndh                          | Atkp016 Cl-0h                                                               | Atkp015 Cl-0h                                                               |
|                                | ndh | ndh                         | ndh                        | ndh                          | ndh                          | n/a                                                                         | Atkp016 Cl-0h                                                               |
|                                | ndh | ndh                         | ndh                        | ndh                          | ndh                          | <u>Synergy:</u><br>Inhibition effect<br>up to 48h                           | <u>Synergy:</u><br>Inhibition effect<br>up to 48h                           |
| <b>70165</b>                   | ndh | In-48h<br>194 rru           | In-48h<br>202 rru          | Cl-10 h<br>In-48h<br>216 rru | In-48h<br>185 rru            | ndh                                                                         | ndh                                                                         |
| <b>K2</b>                      | ndh | Atkp001<br>Cl-0h<br>224 rru | Atkp004: In-48h<br>201 rru | Atkp007<br>Cl-8h<br>257 rru  | Atkp010<br>In-48h<br>185 rru | ndh                                                                         | ndh                                                                         |
|                                | ndh | Atkp009<br>Cl-0h<br>246 rru | Atkp006: Cl-0h<br>246 rru  | Atkp008<br>Cl-8h<br>243 rru  | Atkp009<br>Cl-0h<br>246 rru  | ndh                                                                         | ndh                                                                         |

| Interpratation | ndh                                                        | <u>Synergy:</u><br>Increases clearing<br>effect timing.                     | <u>Proto-<br/>cooperation:</u><br>Clearing effect<br>timing is the<br>same. | <u>Synergy:</u><br>Increases clearing<br>effect timing. | <u>Proto-<br/>cooperation:</u><br>Clearing effect<br>timing is the<br>same. | ndh | ndh |
|----------------|------------------------------------------------------------|-----------------------------------------------------------------------------|-----------------------------------------------------------------------------|---------------------------------------------------------|-----------------------------------------------------------------------------|-----|-----|
| VPKP389        | CI-48h                                                     | CI-28h<br>In-48h                                                            | ndh                                                                         | ndh                                                     | CI-48h                                                                      | ndh | ndh |
| K27            | Atpk001 CI-0h                                              | Atpk001 CI-0h                                                               | ndh                                                                         | ndh                                                     | Atpk009 In-48h                                                              | ndh | ndh |
|                | Atpk008 CI-12h                                             | Atpk009 In-48h                                                              | ndh                                                                         | ndh                                                     | Atpk010<br>CI-0h                                                            | ndh | ndh |
| Interpratation | <u>Synergy:</u><br>Increases<br>clearing effect<br>timing. | <u>Proto-<br/>cooperation:</u><br>Clearing effect<br>timing is the<br>same. | ndh                                                                         | ndh                                                     | <u>Proto-<br/>cooperation:</u><br>Clearing effect<br>timing is the<br>same. | ndh | ndh |

**Abbreviations:** CL, clearing; In, Inhibition; rru, relative respiration unit; PRM, phage resistant mutant; ndh, not described here; “-”, no activity; n/a, not applicable.

Figures S1-S15. *P. aeruginosa* phages EOP.

Figure S1. EOP of *P. aeruginosa* phage Atpa001

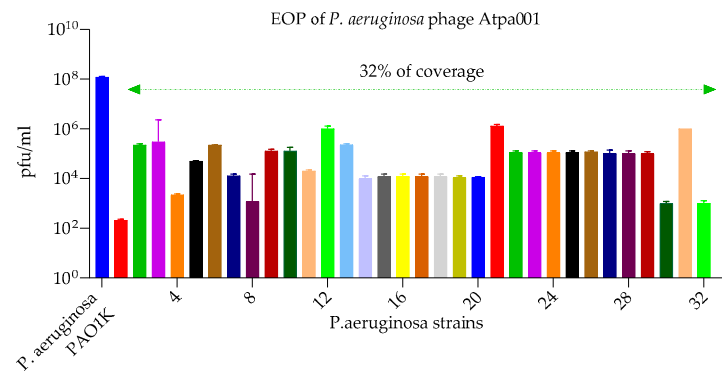

Figure S2. EOP of *P. aeruginosa* phage Atpa002

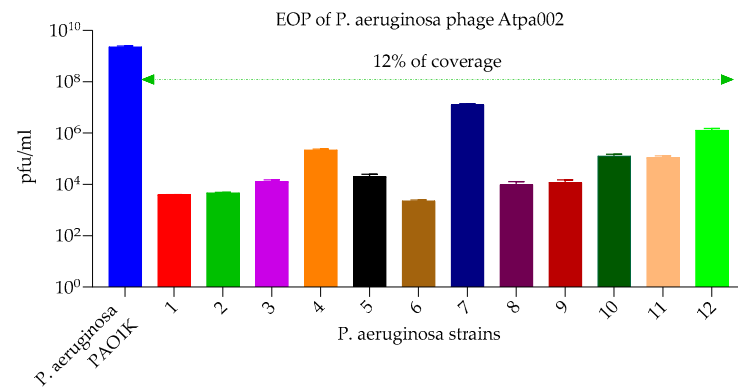



Figure S3. EOP of *P. aeruginosa* phage Atpa003

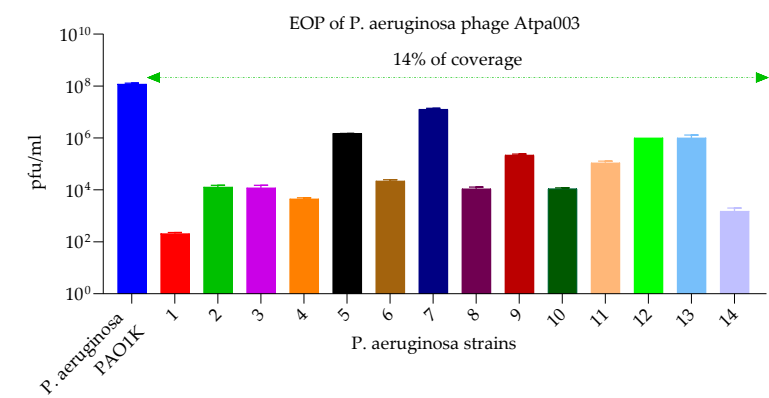

Figure S4. EOP of *P. aeruginosa* phage Atpa004

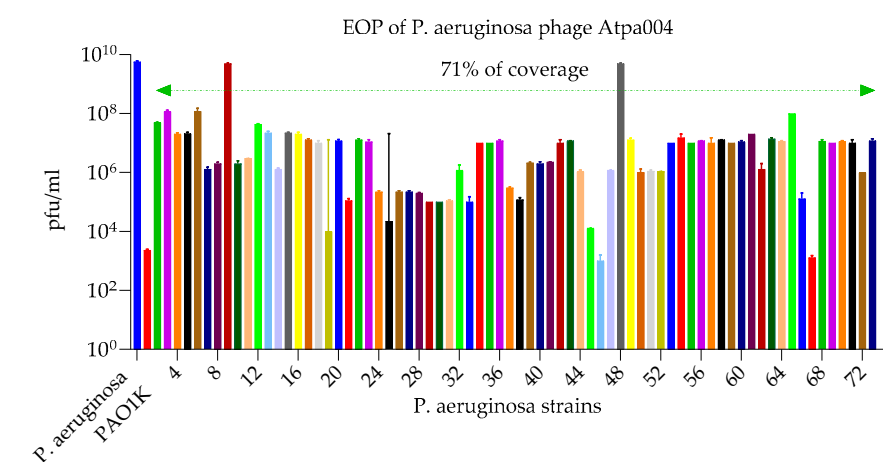

Figure S5. EOP of *P. aeruginosa* phage Atpa005

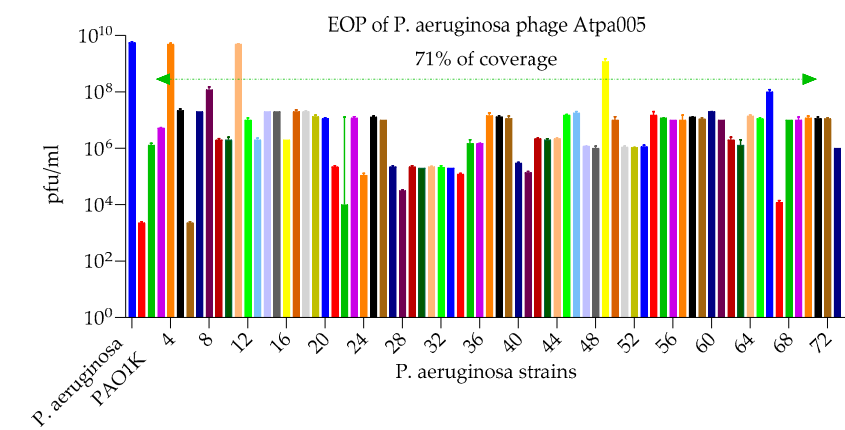

Figure S6. EOP of *P. aeruginosa* phage Atpa006.

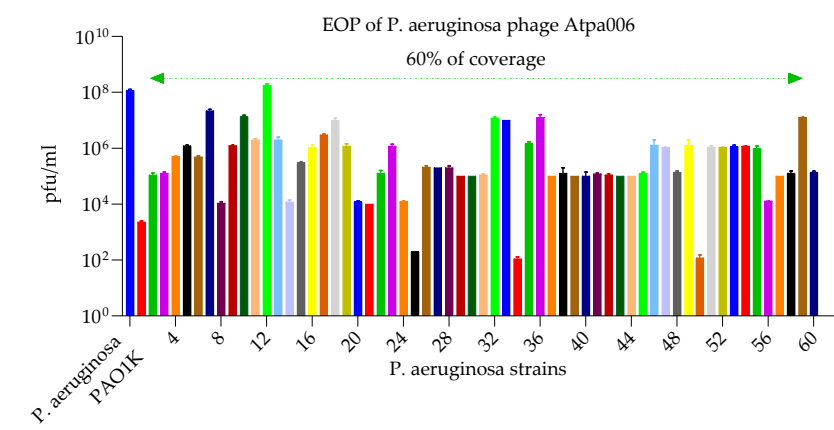

Figure S7. EOP of *P. aeruginosa* phage Atpa008

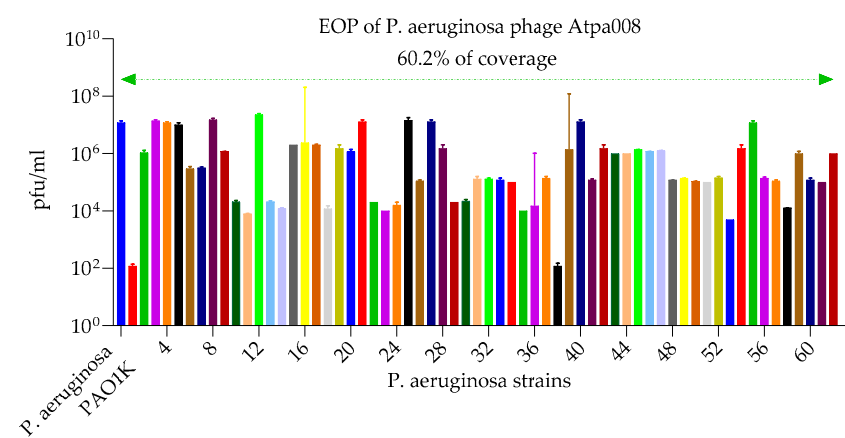

Figure S8. EOP of *P. aeruginosa* phage Atpa009

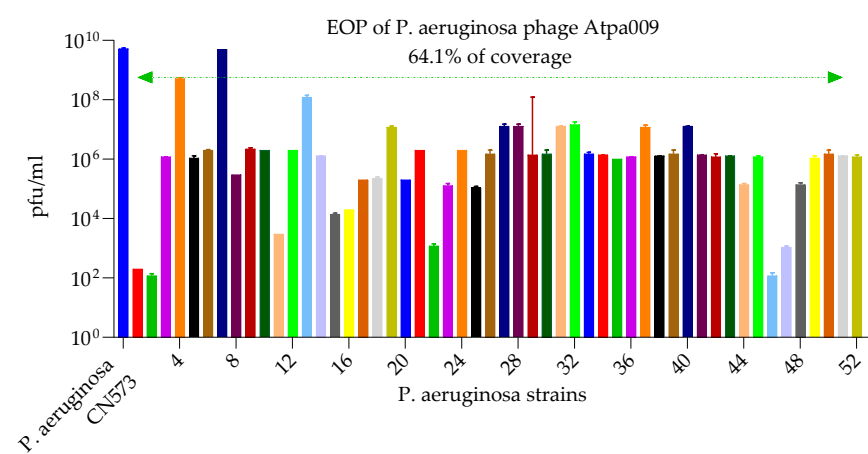

Figure S9. EOP of *P. aeruginosa* phage Atpa010

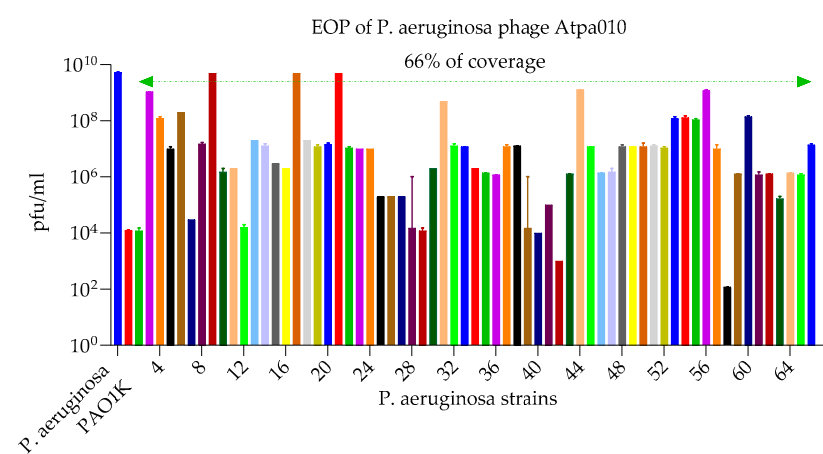

Figure S10. EOP of *P. aeruginosa* phage Atpa011

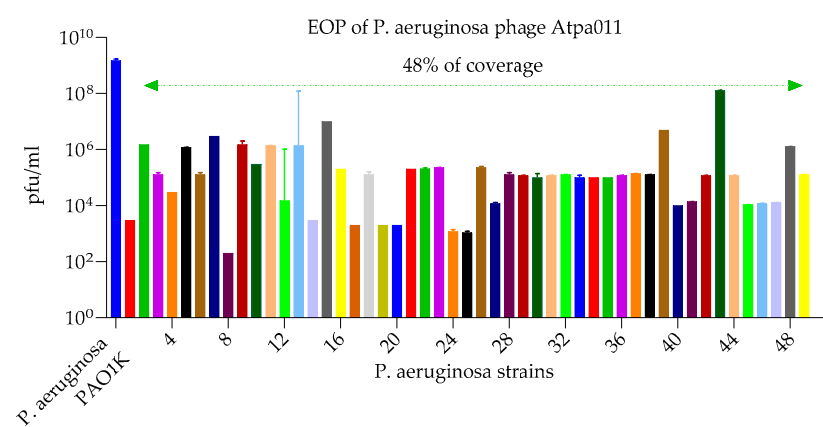

Figure S11. EOP of *P. aeruginosa* phage Atpa012

Figure S12. EOP of *P. aeruginosa* phage Atpa013

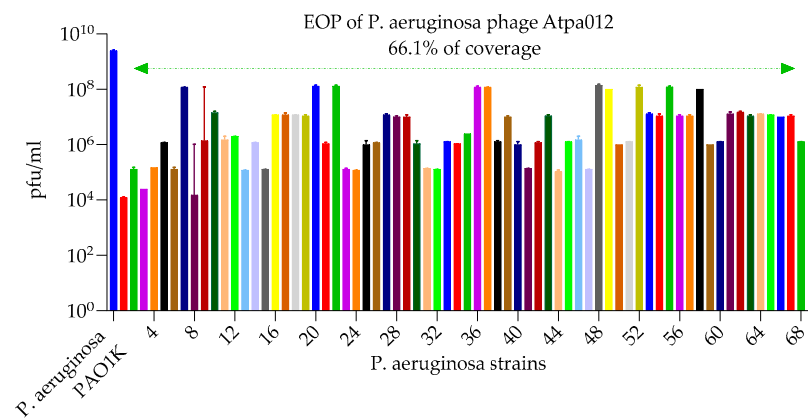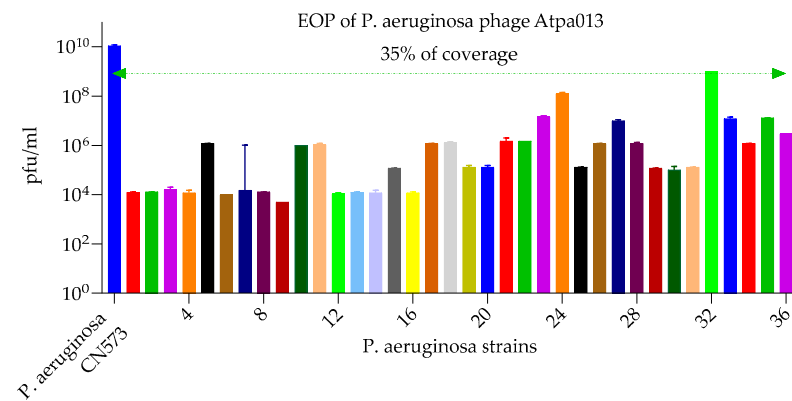

Figure S13. EOP of *P. aeruginosa* phage AQapa008

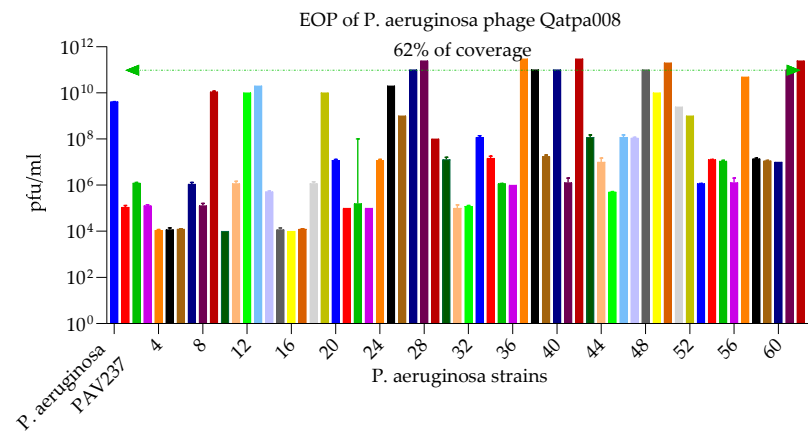

Figure S14. EOP of *P. aeruginosa* phage AQapa009

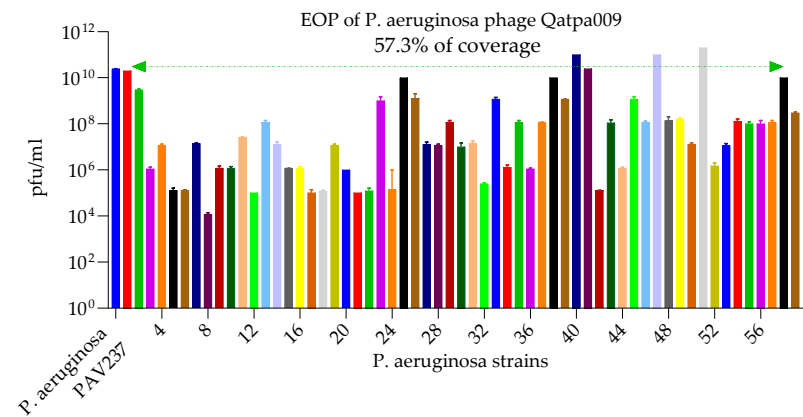

Figure S15. EOP of *P. aeruginosa* phage AQapa010

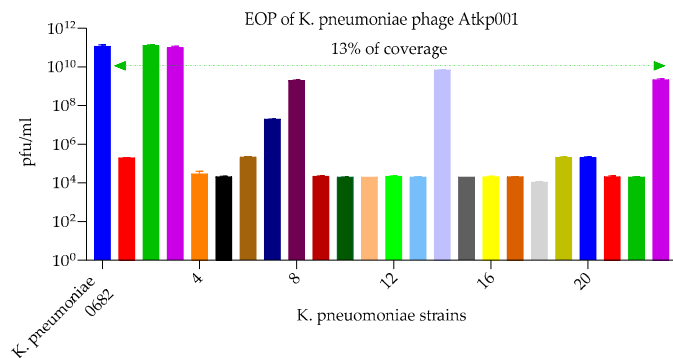

Figure S16. EOP of *K. pneumoniae* phage Atkp001

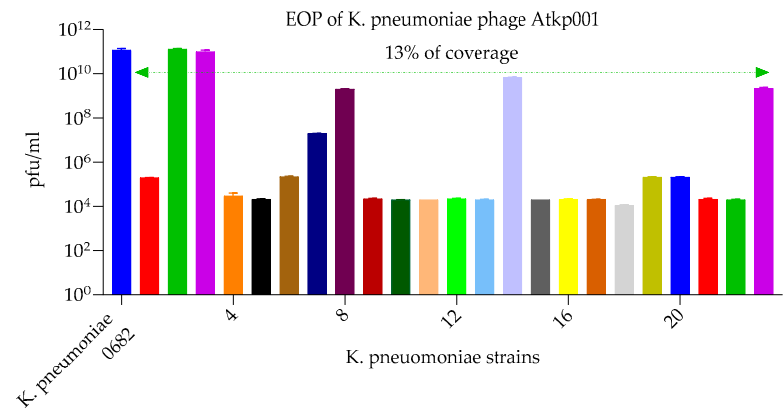

Figure S17. EOP of *K. pneumoniae* phage Atkp004

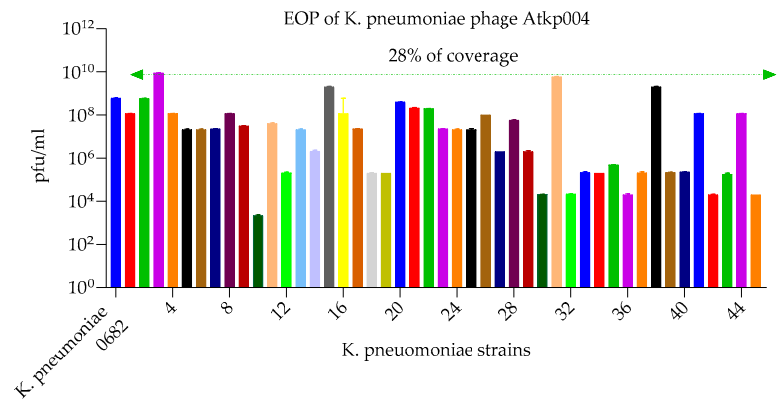

Figure S18. EOP of *K. pneumoniae* phage Atkp006

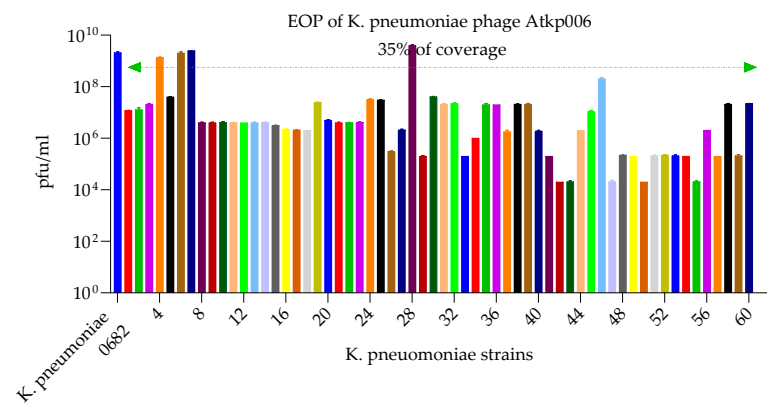

Figure S19. EOP of *K. pneumoniae* phage Atkp007

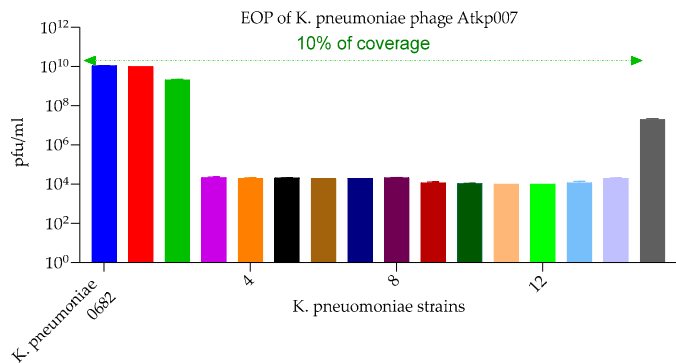

Figure S20. EOP of *K. pneumoniae* phage Atkp008

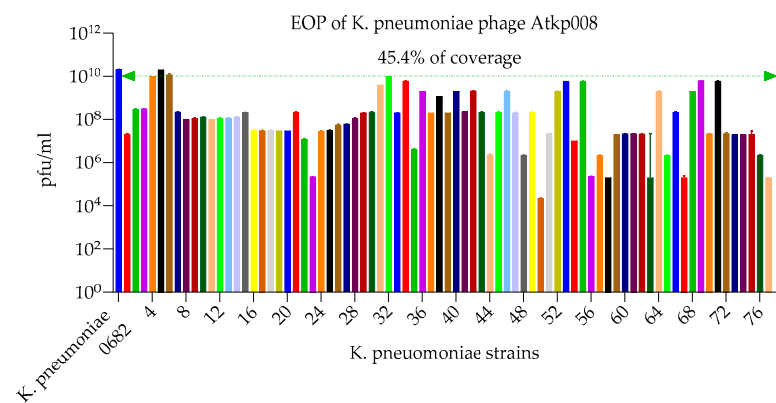

Figure S21. EOP of *K. pneumoniae* phage Atkp009

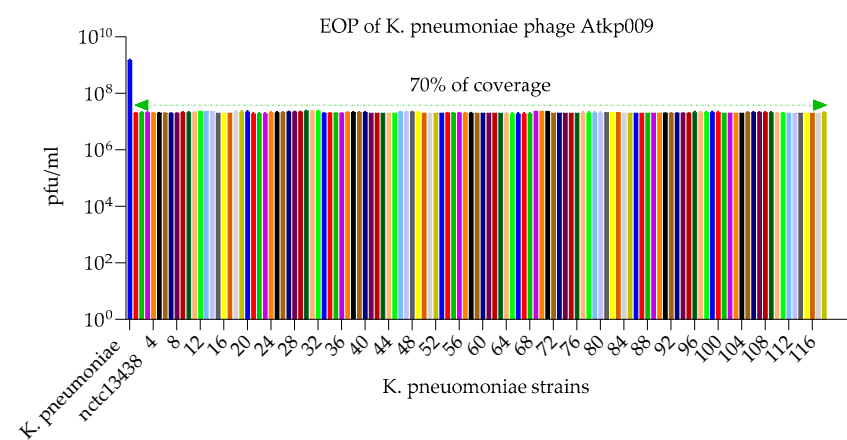

Figure S22. EOP of *K. pneumoniae* phage Atkp012

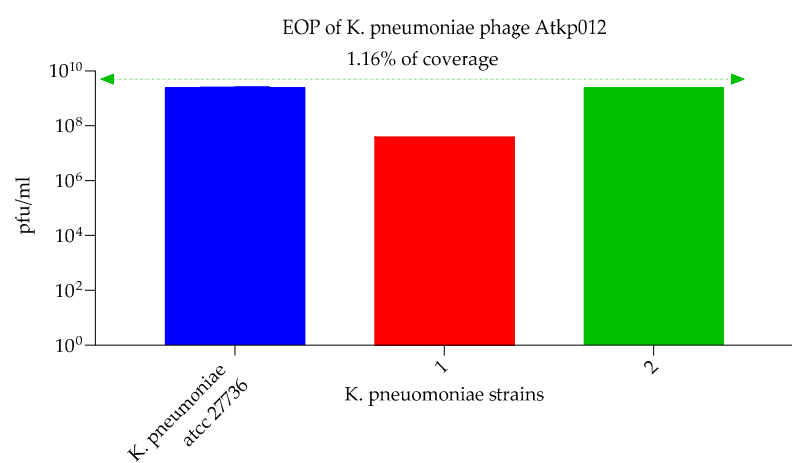

Figure S23. EOP of *K. pneumoniae* phage Atkp014

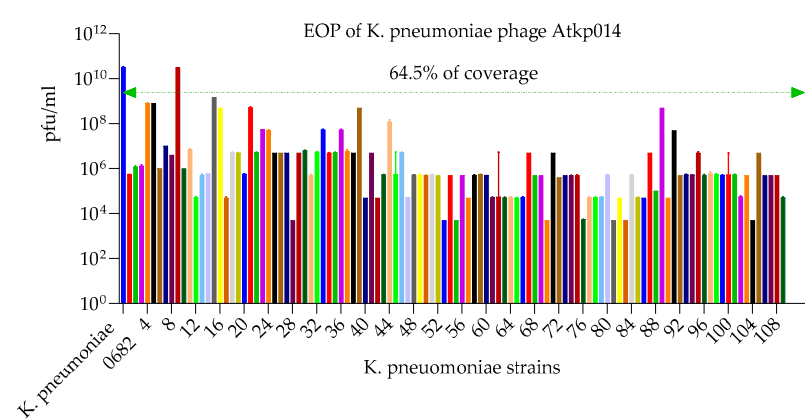

Figure S24. EOP of *K. pneumoniae* phage Atkp015

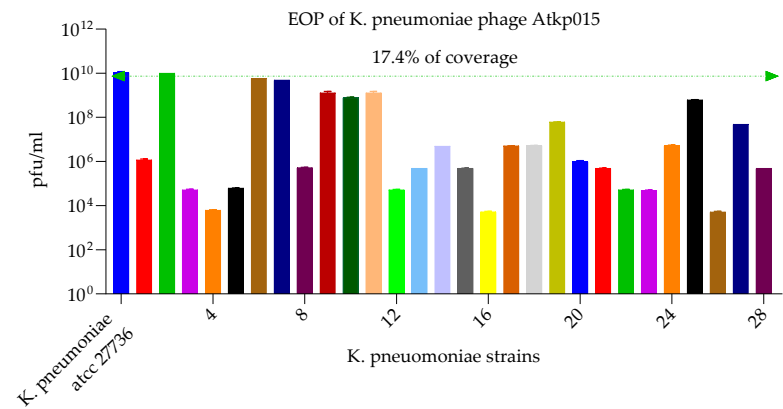

Figure S25. EOP of *K. pneumoniae* phage Atkp016

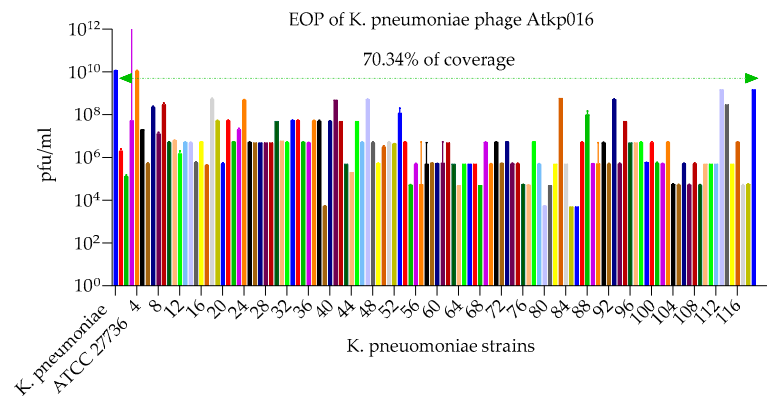

Figures S26-S40. Appelmans assay of *P. aeruginosa* phages.

Figure S26. Appelmans assay of *P. aeruginosa* phage Atpa001

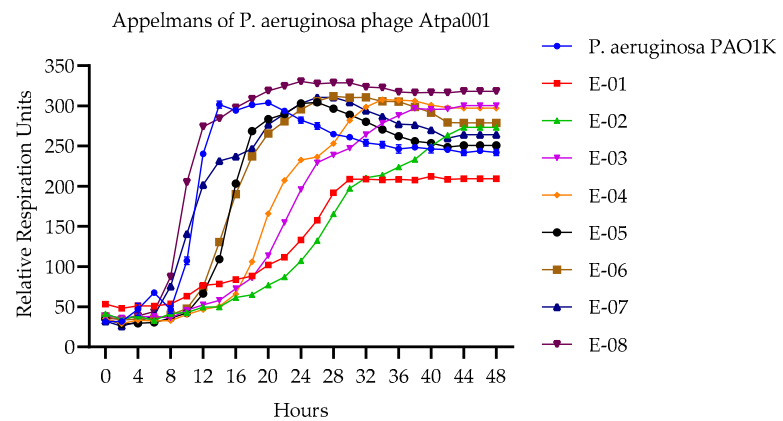

Figure S27. Appelmans assay of *P. aeruginosa* phage Atpa002

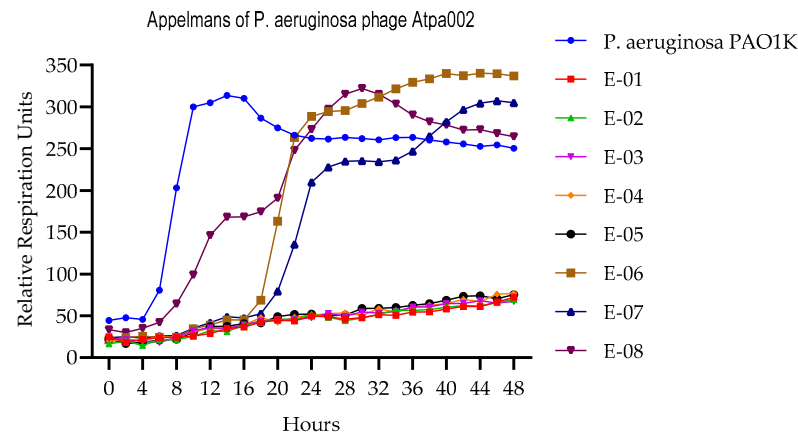

Figure S28. Appelmans assay of *P. aeruginosa* phage Atpa003

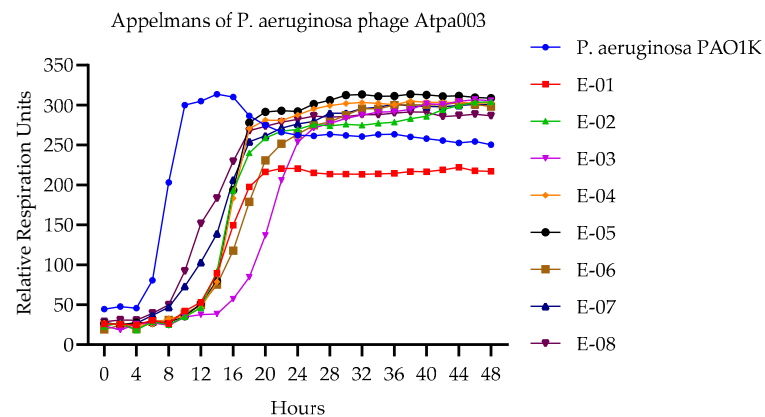

Figure S29. Appelmans assay of *P. aeruginosa* phage Atpa004

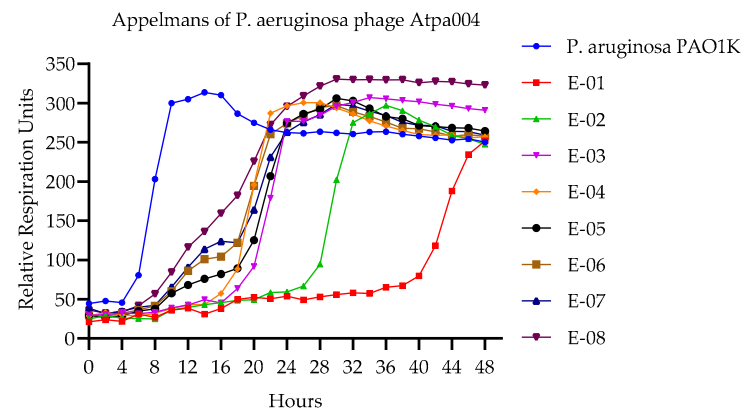

Figure S30. Appelmans assay of *P. aeruginosa* phage Atpa005

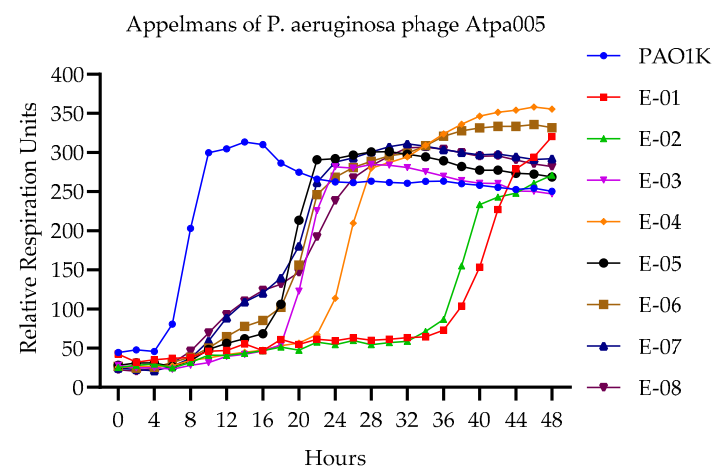

Figure S31. Appelmans assay of *P. aeruginosa* phage Atpa006

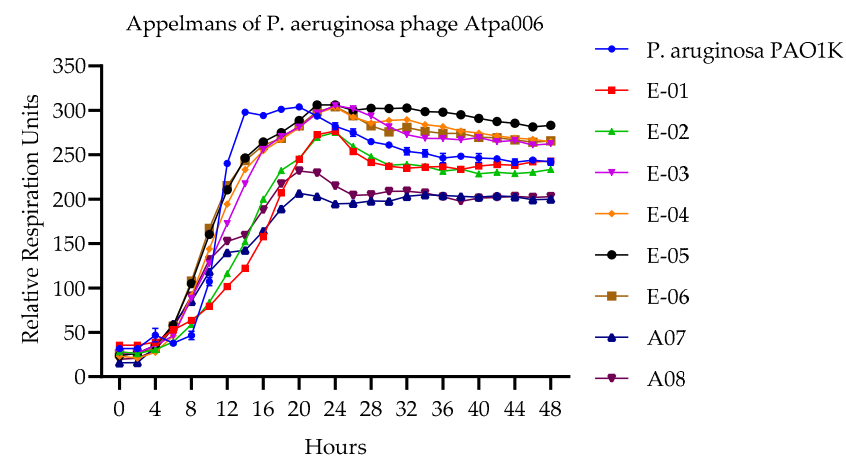

Figure S32. Appelmans assay of *P. aeruginosa* phage Atpa008

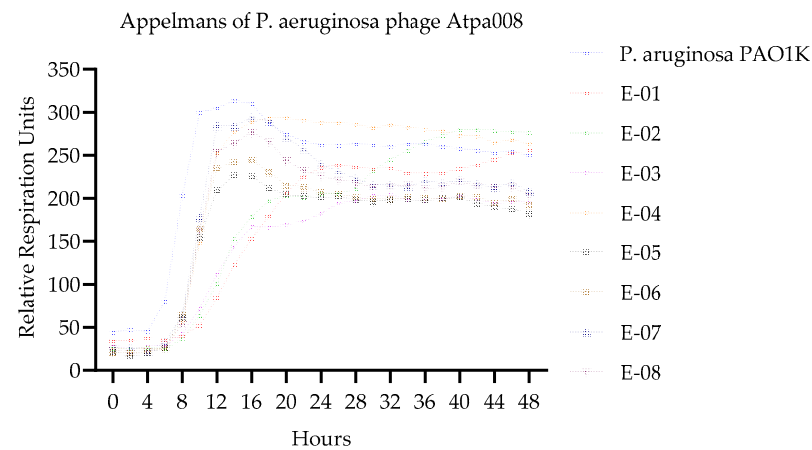

Figure S33. Appelmans assay of *P. aeruginosa* phage Atpa009

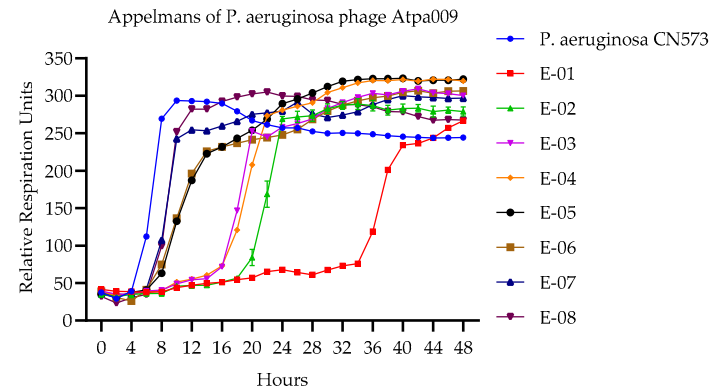

Figure S34. Appelmans assay of *P. aeruginosa* phage Atpa010

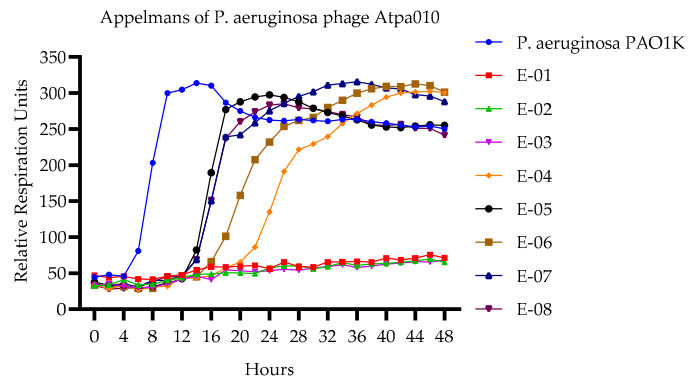

Figure S35. Appelmans assay of *P. aeruginosa* phage Atpa011

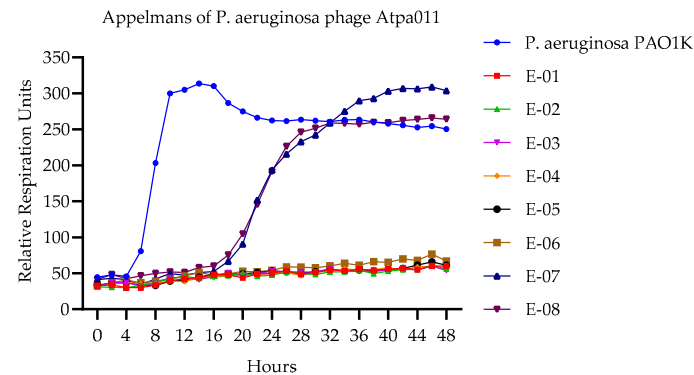



Figure S36. Appelmans assay of *P. aeruginosa* phage Atpa012

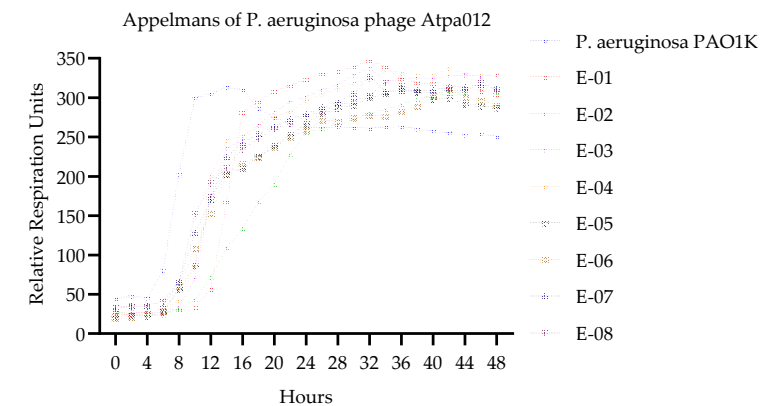

Figure S37. Appelmans assay of *P. aeruginosa* phage Atpa013

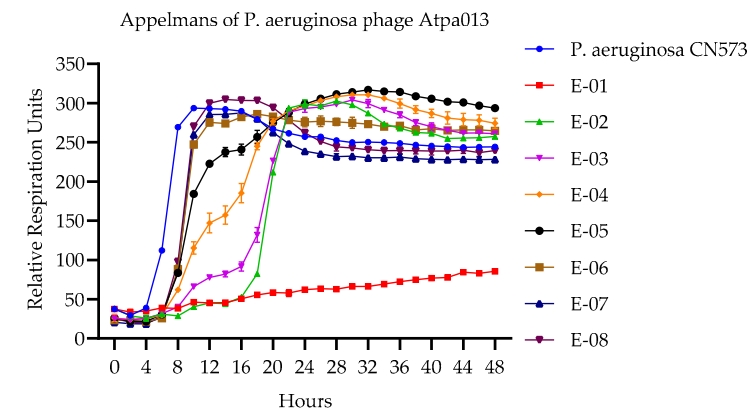

Figure S38. Appelmans assay of *P. aeruginosa* phage Qatpa008

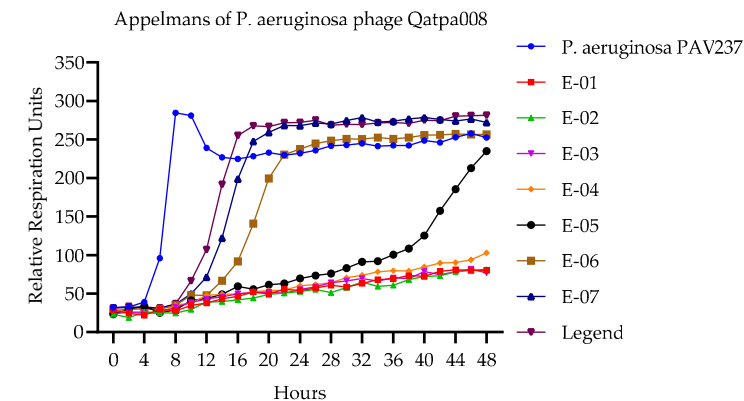

Figure S39. Appelmans assay of *P. aeruginosa* phage Qatpa009

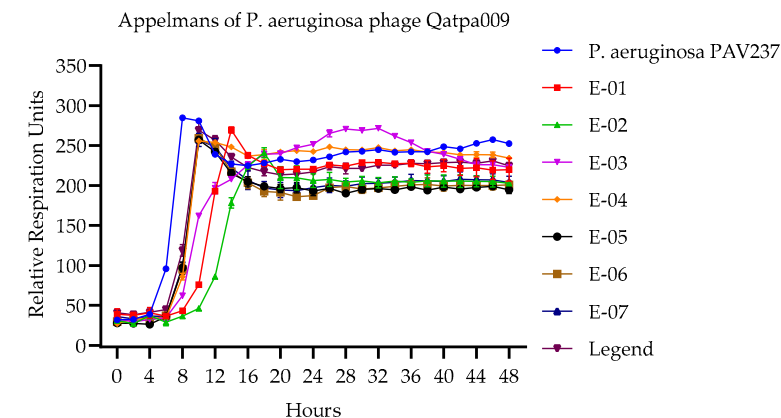

Figure S40. Appelmans assay of *P. aeruginosa* phage Qatpa010

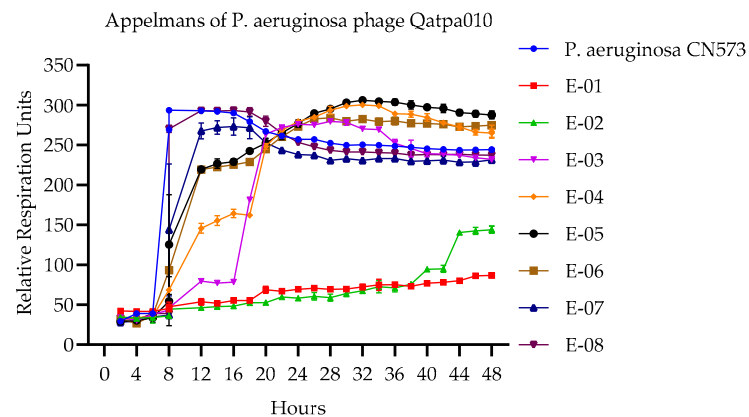

Figures S41-S50. Appelmans assay of *K. pneumoniae* phages.

Figure S41. Appelmans assay of *P. aeruginosa* phage Atkp001

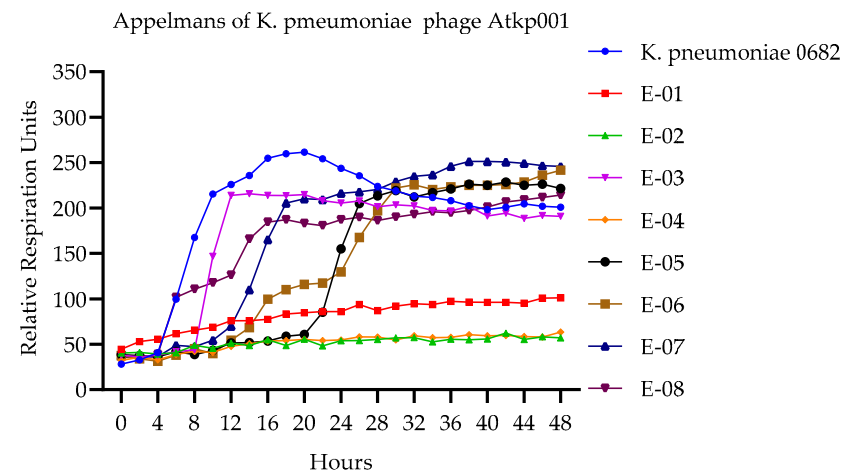

Figure S42. Appelmans assay of *P. aeruginosa* phage Atkp004

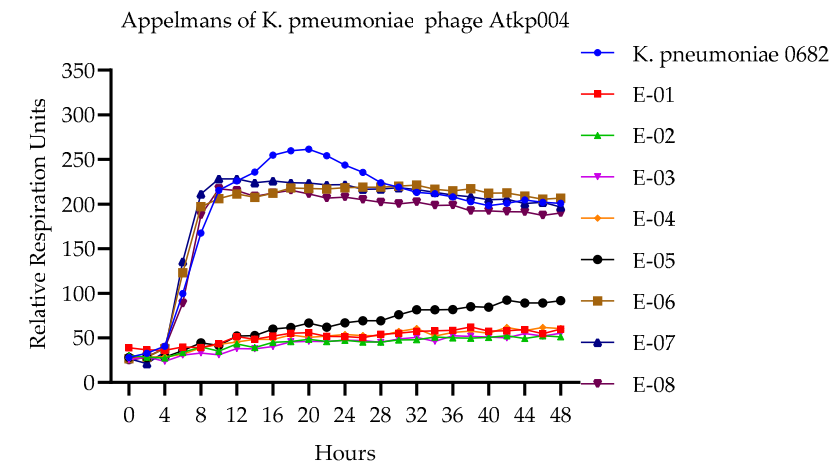

Figure S43. Appelmans assay of *P. aeruginosa* phage Atkp006

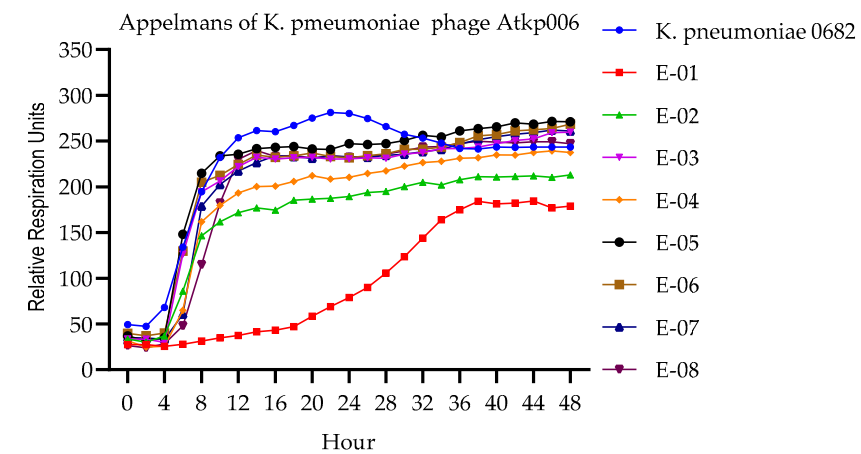

Figure S45. Appelmans assay of *P. aeruginosa* phage Atkp008

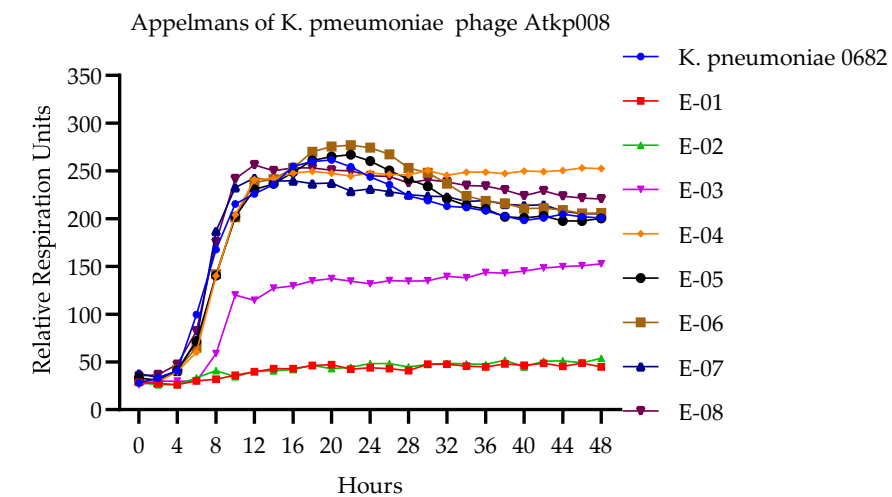

Figure S44. Appelmans assay of *P. aeruginosa* phage Atkp007

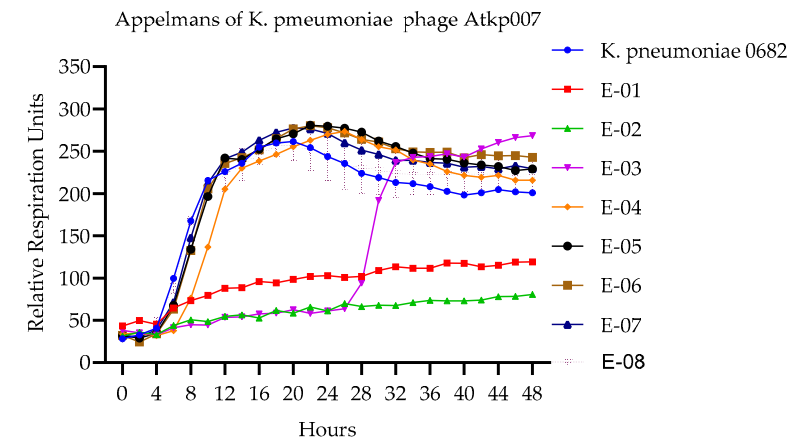

Figure S46. Appelmans assay of *P. aeruginosa* phage Atkp009

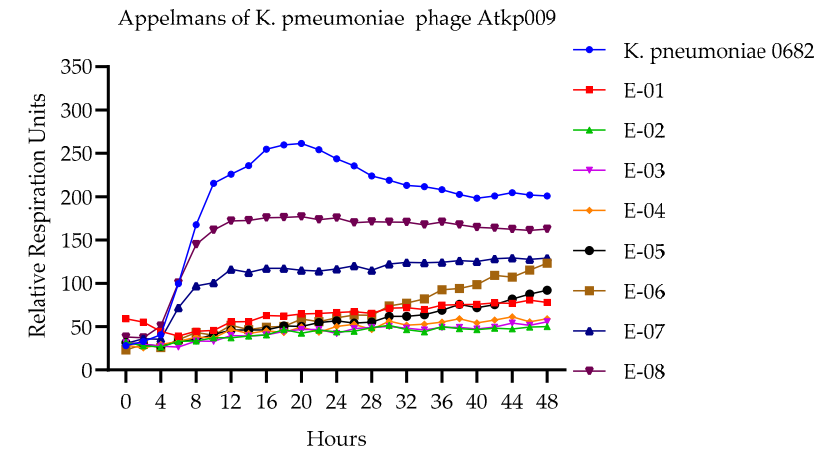

Figure S47. Appelmans assay of *P. aeruginosa* phage Atkp010

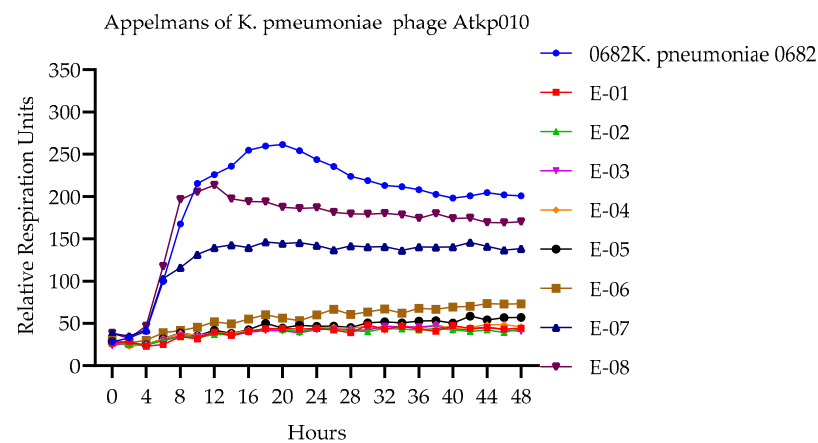

Figure S49. Appelmans assay of *P. aeruginosa* phage Atkp014

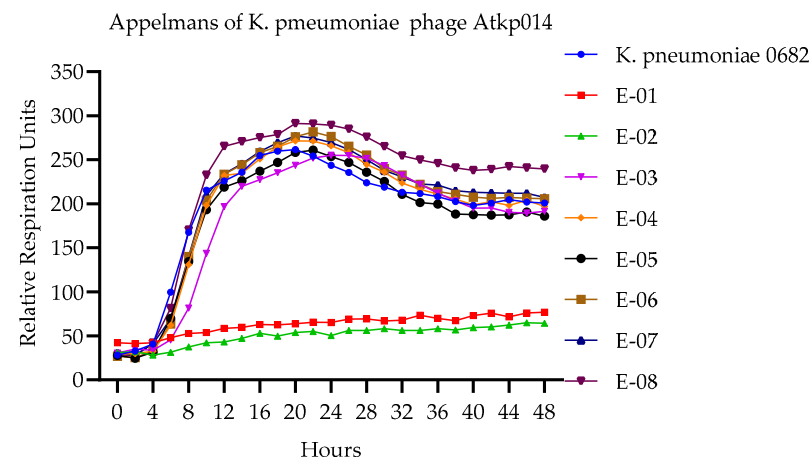

Figure S48. Appelmans assay of *P. aeruginosa* phage Atkp012

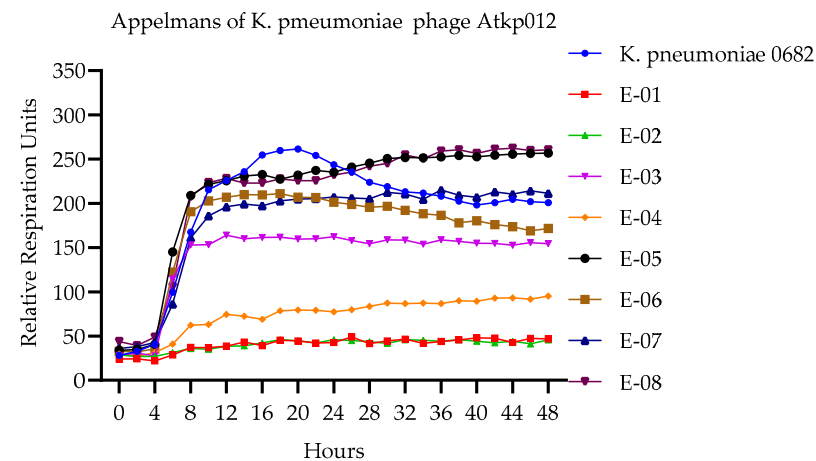

Figure S50. Appelmans assay of *P. aeruginosa* phage Atkp015

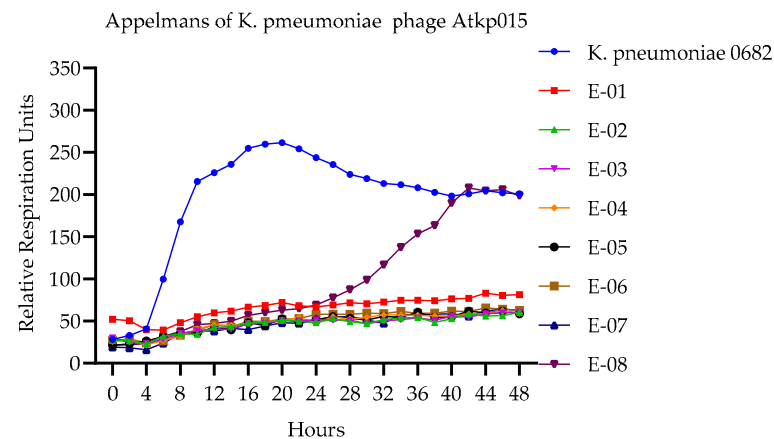

Figure S51. The determination of cfu/ml and pfu/ml at the end point of the OmniLog 48 h incubation of *P. aeruginosa* phage cocktails on CN573.

Determination of cfu/ml and pfu/ml after treatment with cocktails

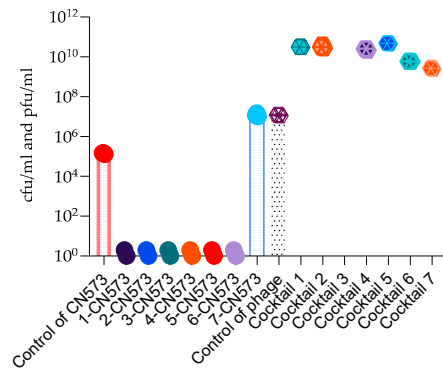

Figure S52. The determination of cfu/ml and pfu/ml at the end point of the OmniLog 48 h incubation of *P. aeruginosa* phage cocktails on PAV237.

Determination of cfu/ml and pfu/ml after treatment with cocktails

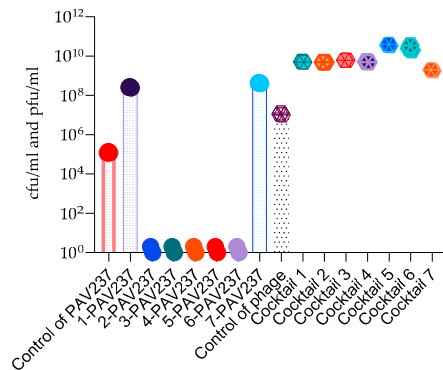

**Figure S53.** (a) the lytic activity curves of *P. aeruginosa* phage's Atpa001-Atpa009 and cocktails 1-4 on PAV237; (b) the lytic activity curves of *P. aeruginosa* phage's Atpa009-Atpa014, Qatpa008-Qatpa010 and cocktails 5-7 on PAV237.

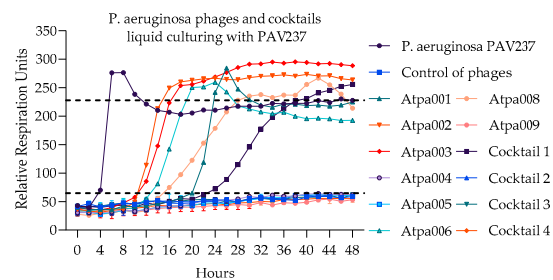

(a)

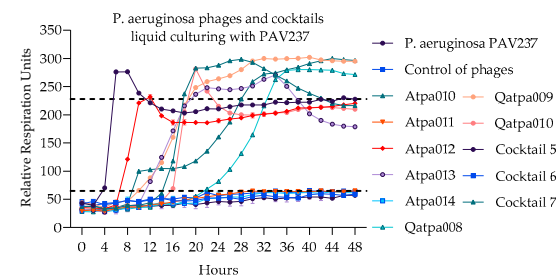

(b)

**Figure S54.** (a) the lytic activity curves of *P. aeruginosa* phage’s Atpa001-Atpa006 and cocktails 1, 3 on PAO1; (b) the lytic activity curves of *P. aeruginosa* phage’s Atpa005-Atpa006 and Atpa010-Atpa011 and cocktails 3, 5 on PA14.

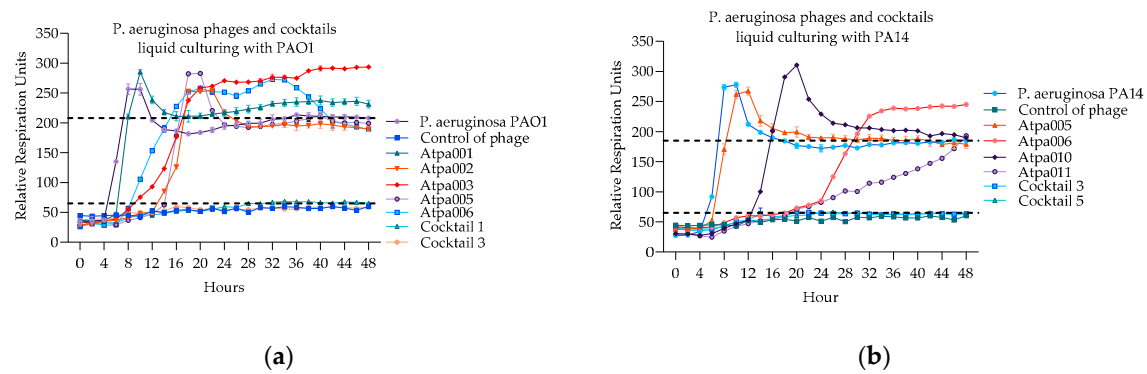

**Figure S55.** (a) the lytic activity curves of *P. aeruginosa* phage’s Atpa001-Atpa003 and cocktails 1, 5 on A11; (b) the lytic activity curves of *P. aeruginosa* phage’s Atpa012-Atpa014, Qatpa008-Qatpa010 and cocktails 6-7 on Is573.

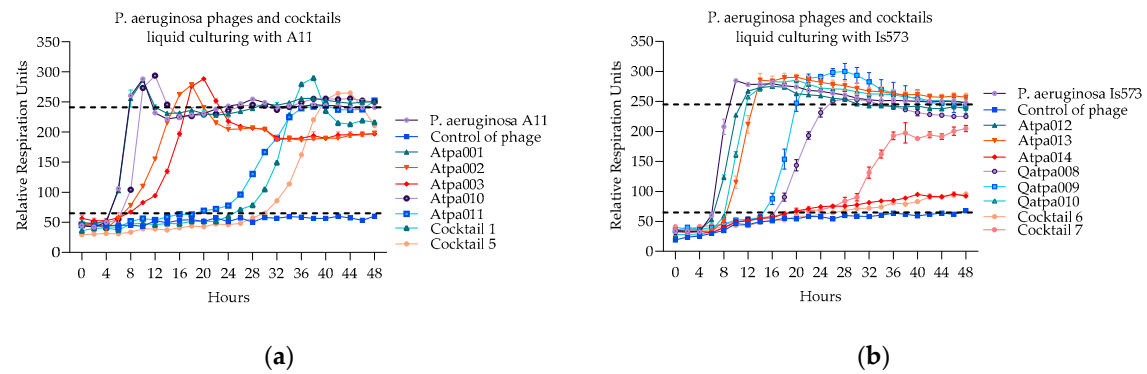

**Figure S56.** (a) the lytic activity curves of *P. aeruginosa* phage’s Atpa008-Atpa011 and cocktails 4-5 on Is580; (b) the lytic activity curves of *P. aeruginosa* phage’s Atpa001-Atpa009 and cocktails 1-4 cocktails 5-7 on PA7.

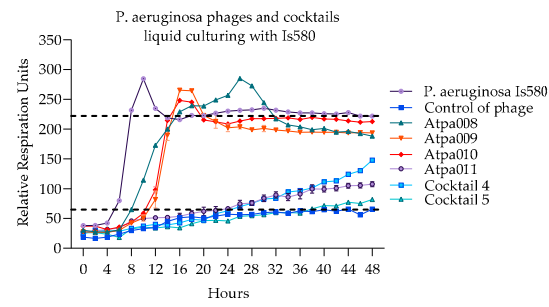

(a)

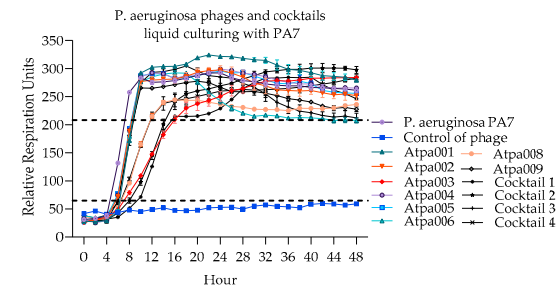

(b)

**Figure S57.** (a) the lytic activity curves of *P. aeruginosa* phage's Atpa009-Atpa014, Qatpa008-Qatpa010 and cocktails 6-7 on PA7 ; (b) the lytic activity curves of *K. pneumoniae* phage's Atpk012-Atpk016 and cocktails 6-7 on nctc13438 curves.

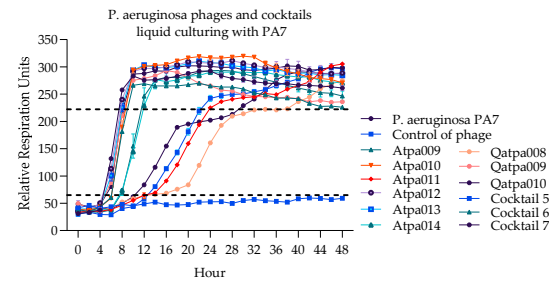

(a)

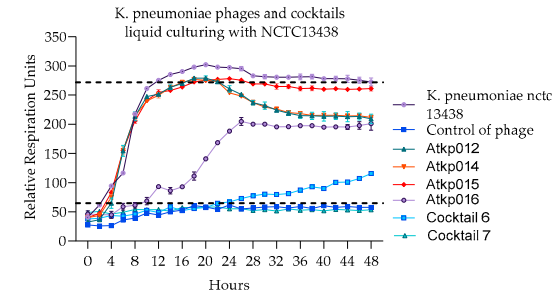

(b)

**Figure S58.** (a) the lytic activity curves of *P. aeruginosa* phage's Atpa009-Atpa014, Qatpa008-Qatpa010 and cocktails 6-7 on PA7 ; (b) the lytic activity curves of *K. pneumoniae* phage's Atpk012-Atpk016 and cocktails 6-7 on nctc13438 curves.

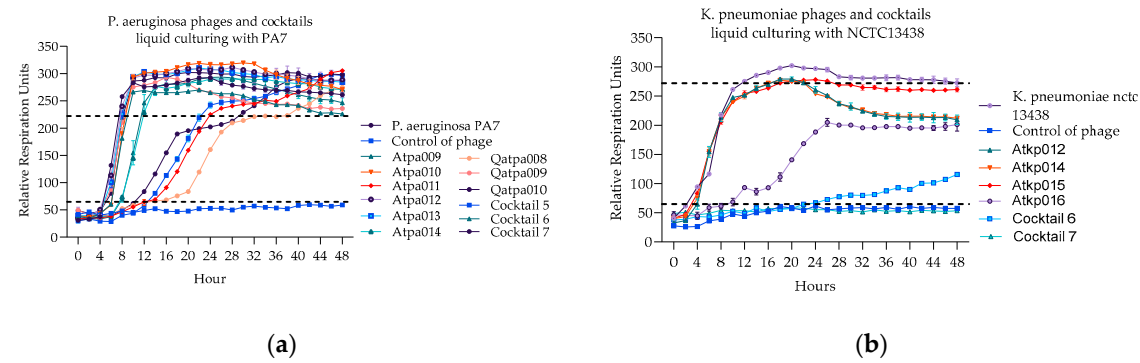

**Figure S59.** (a) the lytic activity curves of *K. pneumoniae* Atkp012-Atkp016 and cocktails 6-7 on SB4385; (b) the lytic activity curves of *K. pneumoniae* phage's Atkp012-Atkp016 and cocktails 6-7 on 10394 curves.

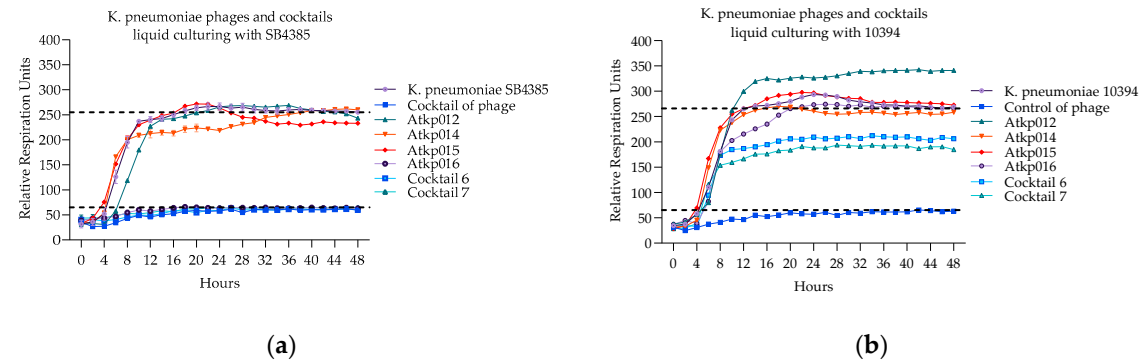

**Figure S60.** (a) the lytic activity curves of *K. pneumoniae* Atkp012-Atkp016 and cocktails 6-7 on VKPKP389. (b) the lytic activity curves of *K. pneumoniae* phage's Atkp001-Atkp009 and cocktails 1-4 on 70165.

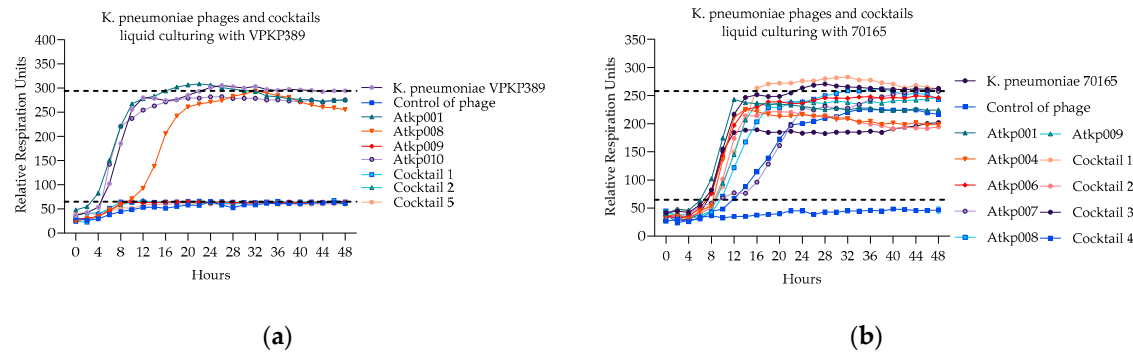

Supplement: s1 [file s1]
